# Supplementary material
Source: Royal Society of Chemistry journal article supplement (doi:10.1039/d5va00190k)
Supplement: d5va00190k1.pdf [file d5va00190k1.pdf]

**Comparative Analysis of Systematic Variations in Life Cycle Analysis of Lithium-ion  
Batteries for Automotive Applications**

Siddharth Shukla<sup>1\*</sup>, Kang Shen<sup>1</sup>, Rakesh K. Iyer<sup>1</sup>, Jarod C. Kelly<sup>1</sup>

<sup>1</sup>Energy Systems and Infrastructure Assessment Division, Argonne National Laboratory, IL,  
USA

\*Corresponding author

**Table S1.** List of reviewed literature with the referenced battery chemistry for which the information was taken from that paper. The electricity mix location/region considered along with the assumed reference year for LCA calculation is also mentioned.

| Reference | Battery chemistry                   | Electricity mix location/region | Reference year used for LCA calculation |
|-----------|-------------------------------------|---------------------------------|-----------------------------------------|
| 1         | NMC111, NMC811, LFP                 | China                           | 2024                                    |
| 2         | NMC111, NMC622                      | Italy                           | 2024                                    |
| 3         | NMC111                              | Asia                            | 2024                                    |
| 4         | NMC111                              | United States                   | 2023                                    |
| 5         | NMC111, NMC532, NMC622, NMC811, LFP | Global                          | 2023                                    |
| 6         | NMC111, NMC532, NMC622, NMC811, LFP | Global                          | 2023                                    |
| 7         | NMC532                              | United States                   | 2023                                    |
| 8         | NMC622                              | Europe, Sweden                  | 2023                                    |
| 9         | NMC811                              | Global                          | 2023                                    |
| 10        | NMC111                              | Europe                          | 2022                                    |
| 11        | NMC111                              | China                           | 2022                                    |
| 12        | NMC111, NMC622, LFP                 | China                           | 2022                                    |
| 13        | NMC111                              | China                           | 2022                                    |
| 14        | NMC111, NMC532, NMC622, NMC811      | United States                   | 2022                                    |
| 15        | NMC111, NMC622, NMC811              | China                           | 2022                                    |
| 16        | NMC811                              | Europe                          | 2022                                    |
| 17        | NMC111                              | Thailand                        | 2021                                    |
| 18        | NMC111, NMC622, NMC811              | Global                          | 2021                                    |
| 19        | NMC111                              | China                           | 2021                                    |
| 20        | NMC111                              | United States                   | 2021                                    |
| 21        | NMC111                              | Global                          | 2021                                    |
| 22        | NMC111                              | China                           | 2021                                    |
| 23        | NMC111                              | China                           | 2020                                    |
| 24        | NMC111                              | United States                   | 2020                                    |
| 25        | NMC111                              | United States                   | 2020                                    |
| 26        | NMC111                              | Europe                          | 2020                                    |
| 27        | NMC532                              | United States                   | 2020                                    |
| 28        | NMC622                              | China                           | 2020                                    |
| 29        | NMC811                              | Not Specified                   | 2020                                    |
| 30        | NMC111, NMC622, LFP                 | United States                   | 2019                                    |
| 31        | NMC111                              | Global                          | 2019                                    |
| 32        | NMC111                              | United States                   | 2019                                    |
| 33        | NMC111, NMC622                      | Global                          | 2019                                    |
| 34        | NMC111                              | China                           | 2019                                    |
| 35        | LFP                                 | China, Europe                   | 2019                                    |
| 36        | NMC111                              | Europe                          | 2018                                    |
| 37        | NMC111                              | Europe                          | 2018                                    |
| 38        | NMC111                              | China                           | 2018                                    |
| 39        | NMC111                              | China                           | 2017                                    |
| 40        | NMC111                              | United States                   | 2017                                    |
| 41        | NMC111                              | Western Europe                  | 2017                                    |
| 42        | LFP                                 | China                           | 2017                                    |
| 43        | NMC111                              | China                           | 2016                                    |
| 44        | NMC111                              | China                           | 2016                                    |
| 45        | NMC111                              | United States                   | 2016                                    |
| 46        | NMC111                              | China                           | 2016                                    |
| 47        | NMC111                              | China                           | 2016                                    |
| 48        | NMC111                              | Europe                          | 2016                                    |
| 49        | LFP                                 | Europe                          | 2016                                    |
| 50        | NMC111                              | United States                   | 2015                                    |
| 51        | NMC111                              | China                           | 2015                                    |
| 52        | LFP                                 | United States                   | 2015                                    |

**Table S2.** The bill of materials for the size battery chemistries referenced in this work.<sup>53,54</sup>

|                                            | <b>NMC111</b> | <b>NMC532</b> | <b>NMC622</b> | <b>NMC811</b> | <b>NMC95</b> | <b>LFP</b> |
|--------------------------------------------|---------------|---------------|---------------|---------------|--------------|------------|
| <b>Cathode Active Material</b>             | 27.7%         | 26.6%         | 26.3%         | 24.8%         | 23.9%        | 27.6%      |
| <b>Graphite</b>                            | 15.6%         | 16.3%         | 16.5%         | 17.4%         | 18.0%        | 14.2%      |
| <b>Binder</b>                              | 0.9%          | 0.9%          | 0.9%          | 0.9%          | 0.9%         | 0.9%       |
| <b>Copper</b>                              | 8.1%          | 7.9%          | 7.9%          | 7.7%          | 7.6%         | 10.1%      |
| <b>Aluminum Sheet</b>                      | 12.0%         | 12.0%         | 12.1%         | 12.1%         | 12.1%        | 12.5%      |
| <b>Electrolyte: LiPF6</b>                  | 1.1%          | 1.1%          | 1.1%          | 1.1%          | 1.1%         | 1.3%       |
| <b>Electrolyte: Ethylene Carbonate</b>     | 3.1%          | 3.0%          | 3.0%          | 3.0%          | 3.0%         | 3.5%       |
| <b>Electrolyte: Dimethyl Carbonate</b>     | 3.1%          | 3.0%          | 3.0%          | 3.0%          | 3.0%         | 3.5%       |
| <b>Plastic: Polypropylene</b>              | 0.1%          | 0.1%          | 0.1%          | 0.1%          | 0.1%         | 0.1%       |
| <b>Plastic: Polyethylene</b>               | 0.7%          | 0.7%          | 0.7%          | 0.6%          | 0.6%         | 1.1%       |
| <b>Plastic: Polymer</b>                    | 0.9%          | 0.9%          | 0.9%          | 0.9%          | 0.9%         | 0.8%       |
| <b>Plastic: Polyethylene Terephthalate</b> | 0.2%          | 0.2%          | 0.2%          | 0.2%          | 0.2%         | 0.2%       |
| <b>Steel</b>                               | 15.3%         | 15.6%         | 15.8%         | 16.2%         | 16.5%        | 13.7%      |
| <b>Stainless Steel</b>                     | 6.2%          | 6.3%          | 6.4%          | 6.5%          | 6.6%         | 5.8%       |
| <b>Thermal Insulation</b>                  | 0.4%          | 0.4%          | 0.4%          | 0.4%          | 0.4%         | 0.3%       |
| <b>Coolant: Glycol</b>                     | 4.0%          | 4.0%          | 4.1%          | 4.1%          | 4.2%         | 3.7%       |
| <b>Electronic Parts</b>                    | 0.8%          | 0.9%          | 0.9%          | 0.9%          | 1.0%         | 0.7%       |

**Table S3.** The bill of materials for NMC111 battery in GREET 2018 model<sup>55</sup> and R&D GREET 2024 model<sup>56</sup> versions.

|                                            | <b>GREET 2018</b> | <b>R&amp;D GREET 2024</b> |
|--------------------------------------------|-------------------|---------------------------|
| <b>Cathode Active Material</b>             | 25.2%             | 27.7%                     |
| <b>Graphite</b>                            | 15.7%             | 15.6%                     |
| <b>Binder</b>                              | 2.2%              | 0.9%                      |
| <b>Copper</b>                              | 11.7%             | 8.1%                      |
| <b>Aluminum Sheet</b>                      | 0.0%              | 12.0%                     |
| <b>Wrought Aluminum</b>                    | 23.9%             | 0.0%                      |
| <b>Electrolyte: LiPF6</b>                  | 1.6%              | 1.1%                      |
| <b>Electrolyte: Ethylene Carbonate</b>     | 4.5%              | 3.1%                      |
| <b>Electrolyte: Dimethyl Carbonate</b>     | 4.5%              | 3.1%                      |
| <b>Plastic: Polypropylene</b>              | 1.1%              | 0.1%                      |
| <b>Plastic: Polyethylene</b>               | 0.4%              | 0.7%                      |
| <b>Plastic: Polymer</b>                    | 0.0%              | 0.9%                      |
| <b>Plastic: Polyethylene Terephthalate</b> | 0.2%              | 0.2%                      |
| <b>Steel</b>                               | 0.6%              | 15.3%                     |
| <b>Stainless Steel</b>                     | 0.0%              | 6.2%                      |
| <b>Thermal Insulation</b>                  | 0.5%              | 0.4%                      |
| <b>Coolant: Glycol</b>                     | 4.3%              | 4.0%                      |
| <b>Electronic Parts</b>                    | 3.7%              | 0.8%                      |

## References

- 1 A. M. Syré, P. Shyposha, L. Freisem, A. Pollak and D. Göhlich, *World Electric Vehicle Journal*, 2024, **15**, 114.
- 2 M. Kolahchian Tabrizi, D. Bonalumi and G. G. Lozza, *Energy*, 2024, **288**, 129622.
- 3 L. Nastasi and S. Fiore, 2024, preprint, DOI: 10.3390/batteries10030090.
- 4 K. Shen, C. Yuan and M. Hauschild, *CIRP Annals*, DOI:10.1016/j.cirp.2023.04.033.
- 5 J. A. Llamas-Orozco, University of Nottingham, 2023.
- 6 J. A. Llamas-Orozco, F. Meng, G. S. Walker, A. F. N. Abdul-Manan, H. L. MacLean, I. D. Posen and J. McKechnie, *PNAS Nexus*, DOI:10.1093/pnasnexus/pgad361.
- 7 K. Shen, Q. Zhai, Y. Gu, W. Wang, H. Cao, M. Hauschild and C. Yuan, *Resour. Conserv. Recycl.*, DOI:10.1016/j.resconrec.2023.107152.
- 8 N. Di Vittorio, A. Accardo, E. Spessa, L. Viscido and E. Tam, *SAE Int. J. Adv. Curr. Pract. Mobil.*, DOI:10.4271/2023-24-0170.
- 9 J. L. Popien, C. Thies, A. Barke and T. S. Spengler, *International Journal of Life Cycle Assessment*, DOI:10.1007/s11367-023-02134-4.
- 10 G. Benveniste, A. Sánchez, H. Rallo, C. Corchero and B. Amante, *Resources, Conservation and Recycling Advances*, DOI:10.1016/j.rcradv.2022.200086.
- 11 S. Jiang, H. Hua, L. Zhang, X. Liu, H. Wu and Z. Yuan, *Science of The Total Environment*, 2022, **811**, 152224.
- 12 C. Xu, B. Steubing, M. Hu, C. Harpprecht, M. van der Meide and A. Tukker, *Resour. Conserv. Recycl.*, DOI:10.1016/j.resconrec.2022.106606.
- 13 Y. Yang, L. Lan, Z. Hao, J. Zhao, G. Luo, P. Fu and Y. Chen, *Energies (Basel)*., DOI:10.3390/en15155321.
- 14 O. Winjobi, J. C. Kelly and Q. Dai, *Sustainable Materials and Technologies*, 2022, **32**, e00415.
- 15 D. Bonalumi and M. Kolahchian Tabrizi, *Energy and Fuels*, DOI:10.1021/acs.energyfuels.2c02204.
- 16 R. Pell and J. J. Lindsay, *Comparative Life Cycle Assessment Study of Solid State and Lithium-ion batteries for Electric Vehicle Application in Europe*, 2022.
- 17 N. R. Gabriel, K. K. Martin, S. J. Haslam, J. C. Faile, R. M. Kamens and S. H. Gheewala, *J. Clean. Prod.*, DOI:10.1016/j.jclepro.2021.128013.
- 18 A. Accardo, G. Dotelli, M. L. Musa and E. Spessa, *Applied Sciences (Switzerland)*, 2021, **11**, 1–32.

- 19 X. Shu, Y. Guo, W. Yang, K. Wei and G. Zhu, *Energy Reports*, 2021, **7**, 2302–2315.
- 20 Q. Dai and J. C. Kelly, in *Electric, Hybrid, and Fuel Cell Vehicles*, Springer New York, New York, NY, 2021, pp. 395–405.
- 21 H. Wu, Y. Hu, Y. Yu, K. Huang and L. Wang, *Int. J. Life Cycle Assess.*, 2021, **26**, 97–113.
- 22 E. Crenna, M. Gauch, R. Widmer, P. Wäger and R. Hirschler, *Resour. Conserv. Recycl.*, 2021, **170**, 105619.
- 23 E. Kallitsis, A. Korre, G. Kelsall, M. Kupfersberger and Z. Nie, *J. Clean. Prod.*, 2020, **254**, 120067.
- 24 J. C. Kelly, Q. Dai and M. Wang, *Mitig. Adapt. Strateg. Glob. Chang.*, 2020, **25**, 371–396.
- 25 F. Wang, Y. Deng and C. Yuan, *J. Clean. Prod.*, DOI:10.1016/j.jclepro.2020.121339.
- 26 M. Mohr, J. F. Peters, M. Baumann and M. Weil, *J. Ind. Ecol.*, DOI:10.1111/jiec.13021.
- 27 C. Yuan, H. Cao, K. Shen, Y. Deng, D. Zeng, Y. Dong and M. Hauschild, *CIRP Annals*, DOI:10.1016/j.cirp.2021.04.038.
- 28 X. Sun, X. Luo, Z. Zhang, F. Meng and J. Yang, *J. Clean. Prod.*, DOI:10.1016/j.jclepro.2020.123006.
- 29 S. Bawankar, G. Dwivedi, I. Nanda, V. Daniel Jiménez Macedo, S. Kesharvani, K. Meshram, S. Jain, S. Mishra, V. Pratap Singh and P. Verma, *Sustainable Energy Technologies and Assessments*, 2023, **60**, 103530.
- 30 R. E. Ciez and J. F. Whitacre, *Nat. Sustain.*, DOI:10.1038/s41893-019-0222-5.
- 31 Q. Dai, J. C. Kelly, L. Gaines and M. Wang, *Batteries*, 2019, **5**, 48.
- 32 Y. Deng, L. Ma, T. Li, J. Li and C. Yuan, *ACS Sustain. Chem. Eng.*, 2019, **7**, 599–610.
- 33 A. Lewrén, 2019.
- 34 R. Yin, S. Hu and Y. Yang, *J. Clean. Prod.*, 2019, **227**, 960–971.
- 35 P. Marques, R. Garcia, L. Kulay and F. Freire, *J. Clean. Prod.*, DOI:10.1016/j.jclepro.2019.05.026.
- 36 Z. Wu and D. Kong, *Clean Technol. Environ. Policy*, DOI:10.1007/s10098-018-1548-9.
- 37 A. Giordano, P. Fischbeck and H. S. Matthews, *Transp. Res. D Transp. Environ.*, DOI:10.1016/j.trd.2017.10.003.
- 38 A. Yu, Y. Wei, W. Chen, N. Peng and L. Peng, *Transp. Res. D Transp. Environ.*, DOI:10.1016/j.trd.2018.09.009.
- 39 H. Hao, Z. Mu, S. Jiang, Z. Liu and F. Zhao, *Sustainability*, 2017, **9**, 504.

- 40 Y. Deng, J. Li, T. Li, X. Gao and C. Yuan, *J. Power Sources*, DOI:10.1016/j.jpowsour.2017.01.036.
- 41 M. Zackrisson, *Life cycle assessment of long life lithium electrode for electric vehicle batteries : cells for Leaf, Tesla and Volvo bus*, 2017.
- 42 L. Vandepaer, J. Cloutier and B. Amor, 2017, preprint, DOI: 10.1016/j.rser.2017.04.057.
- 43 J. Quan, S. Zhao, D. Song, T. Wang, W. He and G. Li, *Science of The Total Environment*, 2022, **819**, 153105.
- 44 Q. Qiao, F. Zhao, Z. Liu, S. Jiang and H. Hao, *Appl. Energy*, DOI:10.1016/j.apenergy.2017.05.041.
- 45 H. Ambrose and A. Kendall, *Transp. Res. D Transp. Environ.*, 2016, **47**, 182–194.
- 46 Q. Lu, P. Wu, W. Shen, X. Wang, B. Zhang and C. Wang, in *Materials Science Forum*, 2016, vol. 847.
- 47 Y. Wang, Y. Yu, K. Huang, B. Chen, W. Deng and Y. Yao, *Environmental Science and Pollution Research*, DOI:10.1007/s11356-016-7849-9.
- 48 L. A.-W. Ellingsen, B. Singh and A. H. Strømman, *Environmental Research Letters*, 2016, **11**, 054010.
- 49 J. Sanf elix, C. de la R ua, J. H. Schmidt, M. Messagie and J. Van Mierlo, *Energies (Basel)*., DOI:10.3390/en9080584.
- 50 Q. Qiao, F. Zhao, Z. Liu, S. Jiang and H. Hao, in *Energy Procedia*, 2017, vol. 105.
- 51 C. M. Lastoskie and Q. Dai, *J. Clean. Prod.*, 2015, **91**, 158–169.
- 52 J. B. Dunn, L. Gaines, J. C. Kelly, C. James and K. G. Gallagher, *Energy Environ. Sci.*, 2015, **8**, 158–168.
- 53 K. W. Knehr, J. J. Kubal, P. A. Nelson and S. Ahmed, *A Manual for BatPaC v5.0 Battery Performance and Cost Modeling for Electric-Drive Vehicles*, 2022.
- 54 M. Wang, A. Elgowainy, Z. Lu, K. Baek, S. Balchandani, P. Benavides, A. Burnham, H. Cai, P. Chen, Y. Gan, U. Gracida-Alvarez, T. Hawkins, T.-Y. Huang, R. Iyer, S. Kar, J. Kelly, T. Kim, C. Kolodziej, K. Lee, U. Lee, X. Liu, F. Masum, M. Morales, C. Ng, L. Ou, T. Poddar, K. Reddi, S. Shukla, U. Singh, L. Sun, P. Sun, T. Sykora, P. Vyawahare and J. Zhang, *Summary of Expansions and Updates in R&D GREET   2023 Energy Systems and Infrastructure Analysis Division Argonne National Laboratory*, Lemont, 2023.
- 55 M. Wang, A. Elgowainy, P. T. Benavides, A. Burnham, H. Cai, Q. Dai, T. R. Hawkins, J. C. Kelly, H. Kwon, D.-Y. Lee, U. Lee, Z. Lu and L. Ou, *Summary of Expansions and Updates in GREET   2018 Energy Systems Division*, 2018.

- 56 M. Wang, H. Cai, L. Ou, A. Elgowainy, M. R. Alam, T. Benavides, L. Benevenuti, A. Burnham, T. N. Do, M. Farhad, Y. Gan, U. Gracida, T. Hawkins, R. K. Iyer, S. Kar, J. C. Kelly, T. Kim, C. Kolodziej, H. Kwon, U. Lee, J. Y. Lim, X. Liu, Z. Lu, M. Morales, C. Ng, I. Pandey, S. Shukla, N. Siddique, P. Sun, T. Sykora, P. Vywahare and J. Zhou, *Summary of Expansions and Updates in R&D GREET® 2024 Energy Systems and Infrastructure Analysis Division Argonne National Laboratory, 2025.*
