# Supplementary material
Source: Royal Society of Chemistry journal article supplement (doi:10.1039/d5va00190k)
Supplement: d5va00190k2.xlsx [file d5va00190k2.xlsx]

## Sheet: NMC111
Order	Paper name	Year	Author	Key quantitative result (battery GHG)	Year for calculation	Functional unit	Cell type	Battery size	Battery pack boundary	LCI data sources	LCI data source year
1	Comparative life cycle assessment of laminated and vacuum vapor-deposited thin film solid-state batteries	2015	Lastoskie and Dai	85 kg CO2e./kWh (Laminated)	2015	1 Wh of stored energy	18650 cylindrical	40 kWh	Components like BMS and coolant are not considered.	BatPac-Nelson, Paul A., Shabbir Ahmed, Kevin G. Gallagher, and Dennis W. Dees. Modeling the performance and cost of lithium-ion batteries for electric-drive vehicles. No. ANL/CSE-19/2. Argonne National Lab.(ANL), Argonne, IL (United States), 2019.	2019
				45 kg CO2e./kWh (Solid state)	2015					Ecoinvent 2.2 (2007)-Hischier, Roland, Mischa Classen, Martin Lehmann, and Wolfram Scharnhorst. "Life cycle inventories of electric and electronic equipment: production, use and disposal." Final report ecoinvent Data v2. 0 18 (2007).	2007
										Dunn, Jennifer B., Linda Gaines, John Sullivan, and Michael Q. Wang. "Impact of recycling on cradle-to-gate energy consumption and greenhouse gas emissions of automotive lithium-ion batteries." Environmental science & technology 46, no. 22 (2012): 12704-12710.	2012
2	Effects of battery chemistry and performance on the life cycle greenhouse gas intensity of electric mobility	2016	Ambrose and Kendall	254 kg CO2e./kWh	2016	1 electric vehicle kilometer of travel (e-VKT)	prismatic pouch	N/A	The whole battery pack with BMS and cooling.	BatPac 3.1-Nelson, Paul A., Shabbir Ahmed, Kevin G. Gallagher, and Dennis W. Dees. Modeling the performance and cost of lithium-ion batteries for electric-drive vehicles. No. ANL/CSE-19/2. Argonne National Lab.(ANL), Argonne, IL (United States), 2019.	2019
										GREET-Dunn, Jennifer B., Linda Gaines, Matthew Barnes, John L. Sullivan, and Michael Wang. Material and energy flows in the materials production, assembly, and end-of-life stages of the automotive lithium-ion battery life cycle. No. ANL/ESD/12-3 Rev. Argonne National Lab.(ANL), Argonne, IL (United States), 2014.	2014
										GREET-Burnham, Andrew, M. Q. Wang, and Y. Wu. Development and applications of GREET 2.7--The Transportation Vehicle-CycleModel. No. ANL/ESD/06-5. Argonne National Lab.(ANL), Argonne, IL (United States), 2006.	2006
3	Life cycle assessment of electric vehicle power battery	2016	Lu et al.	45.55 kg CO2e./kWh	2016	1 kWh of battery	N/A	20 kWh, 125 kg	The whole battery pack with BMS, but it doesn’t have a cooling system.	Primary industrial data	N/A
										Dunn, Jennifer B., Linda Gaines, John Sullivan, and Michael Q. Wang. "Impact of recycling on cradle-to-gate energy consumption and greenhouse gas emissions of automotive lithium-ion batteries." Environmental science & technology 46, no. 22 (2012): 12704-12710.	2012
4	Quantifying the environmental impact of a Li-rich high-capacity cathode material in electric vehicles via life cycle assessment	2016	Wang et al.	68.17 kg CO2e./kWh	2016	1 battery (16 kWh, powering 100km)	pouch	16 kWh, 84.66 kg	The whole battery pack with BMS and cooling.	Ecoinvent 3.0	2016
										Own lab data	2013
										Industrial data	2014
5	The size and range effect: lifecycle greenhouse gas emissions of electric vehicles	2016	Ellingsen et al.	110.17 kg CO2e./kWh (1.95 ton CO2e./battery)	2016	1 battery (180000 km driving range)	pouch	mini car: 17.7 kWh, 177 kg	The whole battery pack with BMS and cooling.	Ellingsen, Linda Ager‐Wick, Guillaume Majeau‐Bettez, Bhawna Singh, Akhilesh Kumar Srivastava, Lars Ole Valøen, and Anders Hammer Strømman. "Life cycle assessment of a lithium‐ion battery vehicle pack." Journal of Industrial Ecology 18, no. 1 (2014): 113-124.	2014
				122.95 kg CO2e./kWh (3.00 ton CO2e./battery)	2016			medium car: 24.4 kWh, 253 kg
				113.78 kg CO2e./kWh (4.79 ton CO2e./battery)	2016			large car: 42.1 kWh, 393 kg
				111.19 kg CO2e./kWh (6.66 ton CO2e./battery)	2016			luxury car: 59.9 kWh, 553 kg
6	Life cycle assessment of long life lithium electrode for electric vehicle batteries: cells for Leaf, Tesla and Volvo bus	2017	Zackrisson	81.22 kg CO2e./kWh	2017	1 km driving	pouch	76 kWh, 457 kg	The whole battery pack with BMS and cooling.	Own lab data	2016
										Ecoinvent 3.1	2014
										Ellingsen, Linda Ager‐Wick, Guillaume Majeau‐Bettez, Bhawna Singh, Akhilesh Kumar Srivastava, Lars Ole Valøen, and Anders Hammer Strømman. "Life cycle assessment of a lithium‐ion battery vehicle pack." Journal of Industrial Ecology 18, no. 1 (2014): 113-124.	2014
7	Cradle-to-gate greenhouse gas emissions of battery electric and internal combustion engine vehicles in China	2017	Qiao et al.	120.67 kg CO2e./kWh	2017			171 kg		Lu, Qiang, Peng Fei Wu, Wan Xia Shen, Xue Chao Wang, Bo Zhang, and Cheng Wang. "Life cycle assessment of electric vehicle power battery." In Materials Science Forum, vol. 847, pp. 403-410. Trans Tech Publications Ltd, 2016.	2016
										GREET 2016	2016
										GREET 2.7-Burnham, Andrew. "Updated vehicle specifications in the GREET vehicle-cycle model." Argonne National Laboratory (2012).	2012
										Primary industrial data
										BatPac-Nelson, Paul A., Shabbir Ahmed, Kevin G. Gallagher, and Dennis W. Dees. Modeling the performance and cost of lithium-ion batteries for electric-drive vehicles - Second Edition. Argonne National Lab.(ANL), Argonne, IL (United States), 2012.	2012
8	Comparative study on life cycle CO2 emissions from the production of electric and conventional vehicles in China	2017	Qiao et al.	N/A				170 kg		GREET 2015	2015
9	GHG Emissions from the production of lithium-ion batteries for electric vehicles in China	2017	Hao et al.	104.0 kg CO2e./kWh	2017	1 kWh of battery	N/A	28 kWh, 170 kg	The whole battery pack with BMS and cooling.	Primary industrial data	2015
										GREET 2015	2015
										BatPac 2015	2015
										Majeau-Bettez, Guillaume, Troy R. Hawkins, and Anders Hammer Strømman. "Life cycle environmental assessment of lithium-ion and nickel metal hydride batteries for plug-in hybrid and battery electric vehicles." Environmental science & technology 45, no. 10 (2011): 4548-4554.	2011
										Lu, Languang, Xuebing Han, Jianqiu Li, Jianfeng Hua, and Minggao Ouyang. "A review on the key issues for lithium-ion battery management in electric vehicles." Journal of power sources 226 (2013): 272-288.	2013
10	Life cycle assessment of high capacity molybdenum disulfide lithium-ion battery for electric vehicles	2017	Deng et al.	180.78 kg CO2e./kWh	2017	1 km driving for a midsized EV powered by the battery pack under average U.S. operating conditions	pouch	51 kWh, 485 kg	The whole battery pack with BMS and cooling.	Primary industrial data	N/A
										BatPac 2015	2015
										Majeau-Bettez, Guillaume, Troy R. Hawkins, and Anders Hammer Strømman. "Life cycle environmental assessment of lithium-ion and nickel metal hydride batteries for plug-in hybrid and battery electric vehicles." Environmental science & technology 45, no. 10 (2011): 4548-4554.	2011
										Ellingsen, Linda Ager‐Wick, Guillaume Majeau‐Bettez, Bhawna Singh, Akhilesh Kumar Srivastava, Lars Ole Valøen, and Anders Hammer Strømman. "Life cycle assessment of a lithium‐ion battery vehicle pack." Journal of Industrial Ecology 18, no. 1 (2014): 113-124.	2014
										Simon, Balint, and Marcel Weil. "Analysis of materials and energy flows of different lithium ion traction batteries." Metallurgical Research & Technology 110, no. 1 (2013): 65-76.	2013
11	Life cycle assessment of lithium-sulfur battery for electric vehicles	2017	Deng et al.	180.16 kg CO2e./kWh	2017	1 km driving for a midsized EV powered by the battery pack under average U.S. operating conditions	pouch	63.8 kWh, 531 kg	The whole battery pack with BMS and cooling.	Primary industrial data	2016
										BatPac 2015	2015
										Ecoinvent	2016
										Ellingsen, Linda Ager‐Wick, Guillaume Majeau‐Bettez, Bhawna Singh, Akhilesh Kumar Srivastava, Lars Ole Valøen, and Anders Hammer Strømman. "Life cycle assessment of a lithium‐ion battery vehicle pack." Journal of Industrial Ecology 18, no. 1 (2014): 113-124.	2014
12	Life cycle environmental impacts and carbon emissions: a case study of electric and gasoline vehicles in China	2018	Yu et al.	107.73 kg CO2e./kWh	2018	the vehicle travelling distance of a single power system during its life cycle (250,000 km)	N/A	27.04 kWh, 150.20 kg	Materials used in battery module and pack assembly, e.g. connectors, fuses, sensors, printed wiring boards, coolants, were not considered.	Primary industrial data	2015
										GaBi 6.0	2012
										Zackrisson, Mats, Lars Avellán, and Jessica Orlenius. "Life cycle assessment of lithium-ion batteries for plug-in hybrid electric vehicles–Critical issues." Journal of cleaner production 18, no. 15 (2010): 1519-1529.	2010
13	Comparative life cycle assessment of lithium‑ion batteries with lithium metal, silicon nanowire, and graphite anodes	2018	Wu and Kong	168.68 kg CO2e./kWh	2018	1 kWh of battery	pouch	100 kWh, 790.01 kg	The whole battery pack with BMS and cooling.	Ecoinvent 3.3	2016
										Ellingsen, Linda Ager‐Wick, Guillaume Majeau‐Bettez, Bhawna Singh, Akhilesh Kumar Srivastava, Lars Ole Valøen, and Anders Hammer Strømman. "Life cycle assessment of a lithium‐ion battery vehicle pack." Journal of Industrial Ecology 18, no. 1 (2014): 113-124.	2014
										Li, Bingbing, Xianfeng Gao, Jianyang Li, and Chris Yuan. "Life cycle environmental impact of high-capacity lithium ion battery with silicon nanowires anode for electric vehicles." Environmental science & technology 48, no. 5 (2014): 3047-3055.	2014
										Zackrisson, Mats. "Life cycle assessment of long life lithiumelectrode for electric vehicle batteries: 5Ah cell." (2016).	2016
14	Environmental and economic comparison of diesel and battery electric delivery vans to inform city logistics fleet replacement strategies	2018	Giordano et al.	184.62 kg CO2e./kWh	2018	1 km driven by an average loaded delivery van in an urban setting	N/A	23.4 kWh, 164.6 kg	The whole battery pack with BMS and cooling.	BatPac 2.2	N/A
				92.31 kg CO2e./kWh	2018			46.8 kWh, 329.1 kg		GREET 2014	2014
				61.54 kg CO2e./kWh	2018			70.2 kWh, 493.7 kg		Ecoinvent 3.0	2016
15	Life cycle assessment of nickel-rich lithium-ion battery for electric vehicles A comparatative LCA between the cathode chemistries NMC 333 and NMC 622	2019	Lewren	52 kg CO2e./kWh	2019	1 kWh of battery	prismatic	85.1 kWh, 520 kg	The whole battery pack with BMS and cooling.	BatPac	2018
										Dai, Q., J. C. Kelly, and A. Elgowainy. "Cobalt life cycle analysis update for the GREET Model." Argonne National Laboratory (2018).	2018
										Dunn, Jennifer B., Christine James, Linda Gaines, Kevin Gallagher, Qiang Dai, and Jarod C. Kelly. Material and energy flows in the production of cathode and anode materials for lithium ion batteries. No. ANL/ESD-14/10 Rev. Argonne National Lab.(ANL), Argonne, IL (United States), 2015.	2015
										Ellingsen, Linda Ager‐Wick, Guillaume Majeau‐Bettez, Bhawna Singh, Akhilesh Kumar Srivastava, Lars Ole Valøen, and Anders Hammer Strømman. "Life cycle assessment of a lithium‐ion battery vehicle pack." Journal of Industrial Ecology 18, no. 1 (2014): 113-124.	2014
										GaBi 6.0	2012
										Ecoinvent 3.4	2017
										Mistry, Mark, Johannes Gediga, and Shannon Boonzaier. "Life cycle assessment of nickel products." The International Journal of Life Cycle Assessment 21 (2016): 1559-1572.	2016
										GREET	2018
16	Life Cycle Analysis of Lithium-Ion Batteries for Automotive Applications	2019	Dai et al.	72.9 kg CO2e./kWh	2019	1 kWh of battery	prismatic	23.5 kWh, 165 kg	The whole battery pack with BMS and cooling.	GREET 2018 (large-scale primary industrial data)	2018
17	Life cycle inventories of the commonly used materials for lithium-ion batteries in China	2019	Yin, Hu & Yang	109.6 kg CO2e./kWh	2019	1 kWh of battery	N/A	N/A	Materials used in battery module and pack assembly, e.g. connectors, fuses, sensors, printed wiring boards, coolants, were not considered.	Primary industrial data	2015
										Chinese Life Cycle Database (CLCD, version 0.8)-Ike, S. I. "Chinese Life Cycle Database (CLCD)." (2012).	2012
										Ecoinvent 3.0	2016
										GaBi 6.0	2012
18	Life cycle assessment of silicon-nanotube-based lithium-ion battery for electric vehicles	2019	Deng et al.	152.18 kg CO2e./kWh	2019	1 km driving for a midsized EV powered by the battery pack under average U.S. operating conditions	pouch	66 kWh, 417 kg	The whole battery pack with BMS and cooling.	Primary industrial data	N/A
										Own lab data	N/A
										GaBi 6.0	2012
										Ecoinvent 3.3	2016
										Calculation based on BatPac3.0	2016
										Li, Bingbing, Xianfeng Gao, Jianyang Li, and Chris Yuan. "Life cycle environmental impact of high-capacity lithium ion battery with silicon nanowires anode for electric vehicles." Environmental science & technology 48, no. 5 (2014): 3047-3055.	2014
										Ellingsen, Linda Ager‐Wick, Guillaume Majeau‐Bettez, Bhawna Singh, Akhilesh Kumar Srivastava, Lars Ole Valøen, and Anders Hammer Strømman. "Life cycle assessment of a lithium‐ion battery vehicle pack." Journal of Industrial Ecology 18, no. 1 (2014): 113-124.	2014
19	Examining different recycling processes for lithium-ion batteries	2019	Ciez & Whitacre	42.4 kg CO2e./kWh	2019	1 kg of battery/1 kWh of battery	cylindrical	N/A (Specific energy=0.21 kWh/kg)	The whole battery pack without BMS and cooling.	GREET 2016	2016
				36.3 kg CO2e./kWh	2019		prismatic	N/A (Specific energy=0.27 kWh/kg)		Environmental Protection Agency Emissions & Generation Resource Integrated Database 2014	2014
										Nakura, Kensuke, Kingo Ariyoshi, Hiroshi Yoshizawa, and Tsutomu Ohzuku. "Characterization of lithium insertion electrodes and its verification: prototype 18650 batteries consisting of LTO and LAMO." Journal of the Electrochemical Society 162, no. 4 (2015): A622.	2015
										BatPac	2018
										EPA Emissions & Generation Resource Integrated Database	2014
20	Life cycle assessment of lithium oxygen battery for electric vehicles	2020	Wang et al.	142.83 kg CO2e./kWh	2020	1 km driving for a midsized EV powered by the battery pack under average U.S. operating conditions	pouch	63.8 kWh, 531 kg	The whole battery pack with BMS and cooling.	Ecoinvent	N/A
										Deng, Yelin, Jianyang Li, Tonghui Li, Xianfeng Gao, and Chris Yuan. "Life cycle assessment of lithium sulfur battery for electric vehicles." Journal of Power Sources 343 (2017): 284-295.	2017
										BatPac	N/A
21	Toward a cell-chemistry specific life cycle assessment of lithium-ion battery recycling processes	2020	Mohr et al.	75.4 kg CO2e./kWh	2020	1 kWh of battery	pouch	N/A (Specific energy=0.17 kWh/kg)	The whole battery pack without BMS and cooling.	Primary industrial data	N/A
										Ecoinvent 3.4	2017
										Peters, Jens F., and Marcel Weil. "Providing a common base for life cycle assessments of Li-Ion batteries." Journal of Cleaner Production 171 (2018): 704-713.	2018
										Dai, Qiang, Jarod C. Kelly, Jennifer Dunn, and Pahola Thatiana Benavides. "Update of Bill-of-materials and Cathode Materials Production for Lithium-ion Batteries in the GREET Model." Argonne National Laboratory (2018).	2018
22	Environmental life cycle assessment of the production in China of lithium-ion batteries with nickel-cobalt-manganese cathodes utilising novel electrode chemistries	2020	Kallitsis et al.	262.41 kg CO2e./kWh	2020	1 kWh of battery	pouch	26.60 kWh, 253 kg	The whole battery pack with BMS and cooling.	Majeau-Bettez, Guillaume, Troy R. Hawkins, and Anders Hammer Strømman. "Life cycle environmental assessment of lithium-ion and nickel metal hydride batteries for plug-in hybrid and battery electric vehicles." Environmental science & technology 45, no. 10 (2011): 4548-4554.	2011
				187.59 kg CO2e./kWh	2020					Dai, Qiang, Jarod C. Kelly, Linda Gaines, and Michael Wang. "Life cycle analysis of lithium-ion batteries for automotive applications." Batteries 5, no. 2 (2019): 48.	2019
										Ellingsen, Linda Ager‐Wick, Guillaume Majeau‐Bettez, Bhawna Singh, Akhilesh Kumar Srivastava, Lars Ole Valøen, and Anders Hammer Strømman. "Life cycle assessment of a lithium‐ion battery vehicle pack." Journal of Industrial Ecology 18, no. 1 (2014): 113-124.	2014
23	Globally regional life cycle analysis of automotive lithium-ion nickel manganese cobalt batteries	2020	Kelly et al.	73.5 kg CO2e./kWh	2020	1 kWh of battery	prismatic	27 kWh, 188.71 kg	The whole battery pack with BMS and cooling.	GREET 2018	2018
				65 kg CO2e./kWh	2020
				100 kg CO2e./kWh	2020
24	Life Cycle Assessment of an NMC Battery for Application to Electric Light-Duty Commercial Vehicles and Comparison with a Sodium-Nickel-Chloride Battery	2021	Accardo et al.	136.63 kg CO2e./kWh	2021	1 kWh of battery	prismatic pouch	35 kWh, 226 kg	The whole battery pack with BMS and cooling.	Majeau-Bettez, G.; Hawkins, T.R.; Strømman, A.H. Life Cycle Environmental Assessment of Lithium-Ion and Nickel Metal Hydride Batteries for Plug-In Hybrid and Battery Electric Vehicles. Environ. Sci. Technol. 2011, 45, 4548–4554.	2011
										Dai, Q.; Kelly, J.C.; Gaines, L.; Wang, M. Life cycle analysis of lithium-ion batteries for automotive applications. Batteries 2019, 5, 48.	2019
										Dai, Q.; Spangenberger, J.; Ahmed, S.; Gaines, L.; Kelly, J.C.; Wang, M. EverBatt: A Closed-loop Battery Recycling Cost and Environmental Impacts Model Energy Systems Division; Argonne National Lab. (ANL): Argonne, IL, USA, 2019.	2019
										Ecoinvent 3.6	2019
25	Lithium-ion batteries for automotive applications: Life cycle analysis	2021	Dai et al.	73 kg CO2e./kWh	2021	1 kWh of battery	prismatic	26.9 kWh	The whole battery pack with BMS and cooling.	GREET 2018 (large-scale primary industrial data)	2018
26	The environmental footprint of electric vehicle battery packs during the production and use phases with different functional units	2021	Wu et al.	177.29 kg CO2e./kWh	2021	1 kg of battery/1 kWh of battery	N/A	N/A	The whole battery pack with BMS and cooling.	Almeida, Arminda, Nuno Sousa, and João Coutinho-Rodrigues. "Quest for sustainability: Life-cycle emissions assessment of electric vehicles considering newer Li-ion batteries." Sustainability 11, no. 8 (2019): 2366.	2019
										Yu, Ang, Yiqun Wei, Wenwen Chen, Najun Peng, and Lihong Peng. "Life cycle environmental impacts and carbon emissions: A case study of electric and gasoline vehicles in China." Transportation Research Part D: Transport and Environment 65 (2018): 409-420.	2018
										Ellingsen, Linda Ager‐Wick, Guillaume Majeau‐Bettez, Bhawna Singh, Akhilesh Kumar Srivastava, Lars Ole Valøen, and Anders Hammer Strømman. "Life cycle assessment of a lithium‐ion battery vehicle pack." Journal of Industrial Ecology 18, no. 1 (2014): 113-124.	2014
										Majeau-Bettez, Guillaume, Troy R. Hawkins, and Anders Hammer Strømman. "Life cycle environmental assessment of lithium-ion and nickel metal hydride batteries for plug-in hybrid and battery electric vehicles." Environmental science & technology 45, no. 10 (2011): 4548-4554.	2011
27	Life-cycle assessment of the environmental impact of the batteries used in pure electric passenger cars	2021	Shu et al.	92.8 kg CO2e./kWh	2021	1 battery	N/A	28.01 kWh, 184.7 kg	The whole battery pack with BMS and cooling.	Primary industrial data-Chinese leading LIB supplier	N/A
										European Reference Life Cycle Database (ELCD)	N/A
										Ellingsen, Linda Ager‐Wick, Guillaume Majeau‐Bettez, Bhawna Singh, Akhilesh Kumar Srivastava, Lars Ole Valøen, and Anders Hammer Strømman. "Life cycle assessment of a lithium‐ion battery vehicle pack." Journal of Industrial Ecology 18, no. 1 (2014): 113-124.	2014
28	Towards more flexibility and transparency in life cycle inventories for Lithium-ion batteries	2021	Crenna et al.	113.6 kg CO2e./kWh	2021	1 kg of battery/1 kWh of battery	prismatic	165 kg (Specific energy=0.143 kWh/kg)	The whole battery pack with BMS and cooling.	BatPac	N/A
										GREET 2	N/A
										Ecoinvent	2013
										Notter, Dominic A., Marcel Gauch, Rolf Widmer, Patrick Wager, Anna Stamp, Rainer Zah, and Hans-Jorg Althaus. "Contribution of Li-ion batteries to the environmental impact of electric vehicles." (2010): 6550-6556.	2010
										Dai, Qiang, Jarod C. Kelly, Jennifer Dunn, and Pahola Thatiana Benavides. "Update of Bill-of-materials and Cathode Materials Production for Lithium-ion Batteries in the GREET Model." Argonne National Laboratory (2018).	2018
29	A comparative life cycle assessment of electric, compressed natural gas, and diesel buses in Thailand	2021	Gabriel et al.	97.5 kg CO2e./kWh	2021	The functional unit is to transport 46 people, 170 km every day for 15 years	N/A	408 kWh, 3150 kg	The whole battery pack with BMS and cooling.	Bangkok Mass Transit Authority BMTA	2020
										GREET	N/A
										Primary industrial data-Edison Motors	2020
										Majeau-Bettez, Guillaume, Troy R. Hawkins, and Anders Hammer Strømman. "Life cycle environmental assessment of lithium-ion and nickel metal hydride batteries for plug-in hybrid and battery electric vehicles." Environmental science & technology 45, no. 10 (2011): 4548-4554.	2011
30	Comparative life cycle assessment of LFP and NCM batteries including the secondary use and different recycling technologies	2022	Quan et al.	87.4 kg CO2e./kWh	2022	1 kWh of battery	N/A	23.5 kWh, 164.99 kg	The whole battery pack with BMS and cooling.	Ecoinvent	N/A
										GREET	N/A
										GaBi 6.0	2012
										Primary industrial data	2016
										Ellingsen, Linda Ager‐Wick, Guillaume Majeau‐Bettez, Bhawna Singh, Akhilesh Kumar Srivastava, Lars Ole Valøen, and Anders Hammer Strømman. "Life cycle assessment of a lithium‐ion battery vehicle pack." Journal of Industrial Ecology 18, no. 1 (2014): 113-124.	2014
31	Environmental impacts of hydrometallurgical recycling and reusing for manufacturing of lithium-ion traction batteries in China	2022	Jiang et al.	129.3 kg CO2e./kWh	2022	1 kg of battery cell	prismatic	N/A (Specific energy=0.15 kWh/kg)	Battery cells (The whole battery pack without BMS and cooling.)	Ecoinvent 3.7	2020
										Primary industrial data-manufacturing companies in Anhui for NMC and Shandong for LFP	N/A
32	Comparative life cycle assessment of Li-Sulphur and Li-ion batteries for electric vehicles	2022	Benveniste et al.	139 kg CO2e./kWh	2022	1 kWh of battery/1 battery (powering 150000km)	cylindrical	35.8 kWh, 312 kg	The whole battery pack with BMS and cooling.	Deng, Yelin, Jianyang Li, Tonghui Li, Xianfeng Gao, and Chris Yuan. "Life cycle assessment of lithium sulfur battery for electric vehicles." Journal of Power Sources 343 (2017): 284-295.	2017
										BatPac 2022	2022
										Primary industrial data-SEAT	N/A
33	Life-cycle analysis, by global region, of automotive lithium-ion nickel manganese cobalt batteries of varying nickel content	2022	Winjobi et al.	59.5 kg CO2e./kWh	2022	1 kWh of battery	prismatic	84 kWh	The whole battery pack with BMS and cooling.	GREET 2020/BatPac 4.0(2020)	2020
				73.7 kg CO2e./kWh	2022
				70.6 kg CO2e./kWh	2022
				68.0 kg CO2e./kWh	2022
				55.1 kg CO2e./kWh	2022
34	Life Cycle Prediction Assessment of Battery Electrical Vehicles with Special Focus on Different Lithium-Ion Power Batteries in China	2022	Yang et al.	113.0 kg CO2e./kWh (year 2020)	2022	1 kWh of battery	N/A	57 kWh, 326 kg	The whole battery pack with BMS and cooling.	Notter, Dominic A., Marcel Gauch, Rolf Widmer, Patrick Wager, Anna Stamp, Rainer Zah, and Hans-Jorg Althaus. "Contribution of Li-ion batteries to the environmental impact of electric vehicles." (2010): 6550-6556.	2010
				83.5 kg CO2e./kWh (year 2025)	2022					Ellingsen, Linda Ager‐Wick, Guillaume Majeau‐Bettez, Bhawna Singh, Akhilesh Kumar Srivastava, Lars Ole Valøen, and Anders Hammer Strømman. "Life cycle assessment of a lithium‐ion battery vehicle pack." Journal of Industrial Ecology 18, no. 1 (2014): 113-124.	2014
				64.6 kg CO2e./kWh (year 2030)	2022					Tagliaferri, Carla, Sara Evangelisti, Federica Acconcia, Teresa Domenech, Paul Ekins, Diego Barletta, and Paola Lettieri. "Life cycle assessment of future electric and hybrid vehicles: A cradle-to-grave systems engineering approach." Chemical Engineering Research and Design 112 (2016): 298-309.	2016
35	Future greenhouse gas emissions of automotive lithium-ion battery cell production	2022	Xu et al.	88.3 kg CO2e./kWh	2022	1 kWh of battery cell	prismatic	N/A	N/A	Ecoinvent 3.6	2019
				65.4 kg CO2e./kWh	2022					Ellingsen, Linda Ager‐Wick, Guillaume Majeau‐Bettez, Bhawna Singh, Akhilesh Kumar Srivastava, Lars Ole Valøen, and Anders Hammer Strømman. "Life cycle assessment of a lithium‐ion battery vehicle pack." Journal of Industrial Ecology 18, no. 1 (2014): 113-124.	2014
				53.3 kg CO2e./kWh	2022					Eiafans:Environmental impact assessment reports in China	2022
										Everbatt	2020
										Xu, Chengjian, Qiang Dai, Linda Gaines, Mingming Hu, Arnold Tukker, and Bernhard Steubing. "Future material demand for automotive lithium-based batteries." Communications Materials 1, no. 1 (2020): 99.	2020
										Erakca, Merve, Manuel Baumann, Werner Bauer, Lea de Biasi, Janna Hofmann, Benjamin Bold, and Marcel Weil. "Energy flow analysis of laboratory scale lithium-ion battery cell production." IScience 24, no. 5 (2021).	2021
36	Re-evaluation of the Global Warming Potential for the Production of Lithium-Ion Batteries with Nickel–Manganese–Cobalt Cathode Chemistries in China	2022		67.97 kg CO2e./kWh	2022	1 kWh of battery	N/A	N/A	The whole battery pack with BMS and cooling.	Peng, Tianduo, Xunmin Ou, Xiaoyu Yan, and Gehua Wang. "Life-cycle analysis of energy consumption and GHG emissions of aluminium production in China." Energy Procedia 158 (2019): 3937-3943.	2019
										GREET 2021	2021
										Yin, Renshu, Shuhan Hu, and Yang Yang. "Life cycle inventories of the commonly used materials for lithium-ion batteries in China." Journal of Cleaner Production 227 (2019): 960-971.	2019
										Engels, Philipp, Felipe Cerdas, Tina Dettmer, Christoph Frey, Jan Hentschel, Christoph Herrmann, Tina Mirfabrikikar, and Maximilian Schueler. "Life cycle assessment of natural graphite production for lithium-ion battery anodes based on industrial primary data." Journal of Cleaner Production 336 (2022): 130474.	2022
37	Estimating the environmental impacts of global lithium-ion battery supply chain: A temporal, geographical, and technological perspective	2023	Llamas-Orozco	80.3 kg CO2e./kWh (year 2020)	2023	1 kWh of battery	N/A	N/A	The whole battery pack with BMS and cooling.	Bitish Geological Survey - World Mineral Production	2019
				73.9 kg CO2e./kWh (SPS 2030)						GREET	2020
				69.6 kg CO2e./kWh (SPS 2040)						IEA - Electricity generation	2020
				62.7 kg CO2e./kWh (SPS 2050)						The World Bank - Electric power transmission and distribution losses	2020
				65.3 kg CO2e./kWh (SDS 2030)						Ecoinvent	2020
				55.5 kg CO2e./kWh (SDS 2040)						Statista - Projected Global Li-ion battery capacity between 2021-2025	2021
				49.4 kg CO2e./kWh (SDS 2050)						The Battery Report 2020	2020
										IEA - World Energy Outlook	2021
										Xu, Chengjian, Qiang Dai, Linda Gaines, Mingming Hu, Arnold Tukker, and Bernhard Steubing. "Future material demand for automotive lithium-based batteries." Communications Materials 1, no. 1 (2020): 99.	2020
										Everbatt	2020
38	Dynamic life cycle assessment of lithium-ion batteries for electric vehicles	2023	Llamas-Orozco	80.55 kg CO2e./kWh	2023	1 kWh of battery	N/A	N/A	The whole battery pack with BMS and cooling.	GREET	2020
										IEA - Electricity generation	2020
										The World Bank - Electric power transmission and distribution losses	2020
										Ecoinvent	2020
										Statista - Projected Global Li-ion battery capacity between 2021-2025	2021
										The Battery Report 2020	2020
										IEA - World Energy Outlook	2021
										Xu, Chengjian, Qiang Dai, Linda Gaines, Mingming Hu, Arnold Tukker, and Bernhard Steubing. "Future material demand for automotive lithium-based batteries." Communications Materials 1, no. 1 (2020): 99.	2020
										Everbatt	2020
										BGS– World Mineral Production	2019
39	Direct recycling of lithium ion batteries from electric vehicles for closed-loop life cycle impact mitigation	2023	Shen et al.	122.8 kg CO2e./kWh	2023	1 kg of battery	pouch	66 kWh, 417 kg	The whole battery pack with BMS and cooling.	Ellingsen, Linda Ager‐Wick, Guillaume Majeau‐Bettez, Bhawna Singh, Akhilesh Kumar Srivastava, Lars Ole Valøen, and Anders Hammer Strømman. "Life cycle assessment of a lithium‐ion battery vehicle pack." Journal of Industrial Ecology 18, no. 1 (2014): 113-124.	2014
										Deng, Yelin, Jianyang Li, Tonghui Li, Xianfeng Gao, and Chris Yuan. "Life cycle assessment of lithium sulfur battery for electric vehicles." Journal of Power Sources 343 (2017): 284-295.	2017
40	Environmental Assessment of Lithium-Ion Battery Lifecycle and of Their Use in Commercial Vehicles	2024	Nastasi et al.	115.4 kg CO2e./kWh	2024	1 kg of battery	Average	23.5 kWh, 165 kg (119.77 kg of cells)	The whole battery pack with BMS and cooling.	Primary industrial data	N/A
				114.9 kg CO2e./kWh	2024					Secondary literature	N/A
				114.4 kg CO2e./kWh	2024					Ecoinvent	N/A
										GREET	N/A
41	Analyzing the global warming potential of the production and utilization of lithium-ion batteries with nickel-manganese-cobalt cathode chemistries in European Gigafactories	2024	Tabrizi et al.	56.4 kg CO2e./kWh	2024	1 kWh of battery	N/A	23.5 kWh, 154.13 kg	The whole battery pack with BMS and cooling.	GREET 2021	2021
				49.2 kg CO2e./kWh	2024					BatPac	N/A
				57.6 kg CO2e./kWh	2024					Dai, Qiang, Jarod C. Kelly, Linda Gaines, and Michael Wang. "Life cycle analysis of lithium-ion batteries for automotive applications." Batteries 5, no. 2 (2019): 48.	2019
				84.4 kg CO2e./kWh	2024					Zu, Chenxi, Yu Ren, Fuliang Guo, Huigen Yu, and Hong Li. "A Reflection on Lithium‐Ion Batteries from a Lithium‐Resource Perspective." Advanced Energy and Sustainability Research 2, no. 10 (2021): 2100062.	2021
42	Comparative Life Cycle Assessment of Battery and Fuel Cell Electric Cars, Trucks, and Buses	2024	Syre et al.	148.1 kg CO2e./kWh	2024	1 kg of battery/1 kWh of battery	prismatic	N/A (Specific energy=0.143 kWh/kg)	The whole battery pack with BMS and cooling.	Ecoinvent 3.9.1	2022
										Everbatt	2024
										Dai, Q., J. Dunn, J. C. Kelly, and A. Elgowainy. "Update of life cycle analysis of lithium-ion batteries in the GREET model." Argonne National Laboratory 20171 (2017).	2017
										Dai, Qiang, Jarod C. Kelly, Linda Gaines, and Michael Wang. "Life cycle analysis of lithium-ion batteries for automotive applications." Batteries 5, no. 2 (2019): 48.	2019

## Sheet: NMC532
Order	Paper name	Year	Author	Key quantitative result (battery GHG)	Year for calculation	Functional unit	Cell type	Battery size	Battery pack boundary	LCI data sources	LCI data source year
1	Water-based manufacturing of lithium ion battery for life cycle impact mitigation	2021	Shen et al.	147.8 kg CO2e./kWh	2021	1 kg of battery	pouch	57 kWh, 417 kg	The whole battery pack with BMS and cooling.	Deng, Yelin, Jianyang Li, Tonghui Li, Xianfeng Gao, and Chris Yuan. "Life cycle assessment of lithium sulfur battery for electric vehicles." Journal of Power Sources 343 (2017): 284-295.	2017
2	Life-cycle analysis, by global region, of automotive lithium-ion nickel manganese cobalt batteries of varying nickel content	2022	Winjobi et al.	59.3 kg CO2e./kWh	2022	1 kWh of battery	prismatic	84 kWh	The whole battery pack with BMS and cooling.	GREET 2020/BatPac 4.0(2020)	2020
				73.0 kg CO2e./kWh	2022
				70.0 kg CO2e./kWh	2022
				67.5 kg CO2e./kWh	2022
				55.0 kg CO2e./kWh	2022
3	Future greenhouse gas emissions of automotive lithium-ion battery cell production	2022	Xu et al.	89.2 kg CO2e./kWh	2022	1 kWh of battery cell	prismatic	N/A	N/A	Ecoinvent 3.6	2019
				66.7 kg CO2e./kWh	2022					Ellingsen, Linda Ager‐Wick, Guillaume Majeau‐Bettez, Bhawna Singh, Akhilesh Kumar Srivastava, Lars Ole Valøen, and Anders Hammer Strømman. "Life cycle assessment of a lithium‐ion battery vehicle pack." Journal of Industrial Ecology 18, no. 1 (2014): 113-124.	2014
				54.6 kg CO2e./kWh	2022					Eiafans:Environmental impact assessment reports in China	2022
										Everbatt	2020
										Xu, Chengjian, Qiang Dai, Linda Gaines, Mingming Hu, Arnold Tukker, and Bernhard Steubing. "Future material demand for automotive lithium-based batteries." Communications Materials 1, no. 1 (2020): 99.	2020
										Erakca, Merve, Manuel Baumann, Werner Bauer, Lea de Biasi, Janna Hofmann, Benjamin Bold, and Marcel Weil. "Energy flow analysis of laboratory scale lithium-ion battery cell production." IScience 24, no. 5 (2021).	2021
										Ellingsen, Linda Ager‐Wick, Guillaume Majeau‐Bettez, Bhawna Singh, Akhilesh Kumar Srivastava, Lars Ole Valøen, and Anders Hammer Strømman. "Life cycle assessment of a lithium‐ion battery vehicle pack." Journal of Industrial Ecology 18, no. 1 (2014): 113-124.	2014
4	Life cycle assessment of lithium ion battery from water-based manufacturing for electric vehicles	2023	Shen et al.	113.7 kg CO2e./kWh	2023	1 km driving of a mid-size EV powered by the NMC battery pack	pouch	46.26 kWh, 292.27 kg	The whole battery pack with BMS and cooling.	Deng, Yelin, Jianyang Li, Tonghui Li, Xianfeng Gao, and Chris Yuan. "Life cycle assessment of lithium sulfur battery for electric vehicles." Journal of Power Sources 343 (2017): 284-295.	2017
										Ellingsen, Linda Ager‐Wick, Guillaume Majeau‐Bettez, Bhawna Singh, Akhilesh Kumar Srivastava, Lars Ole Valøen, and Anders Hammer Strømman. "Life cycle assessment of a lithium‐ion battery vehicle pack." Journal of Industrial Ecology 18, no. 1 (2014): 113-124.	2014
5	Estimating the environmental impacts of global lithium-ion battery supply chain: A temporal, geographical, and technological perspective	2023	Llamas-Orozco	83.5 kg CO2e./kWh (year 2020)	2023	1 kWh of battery	N/A	N/A	The whole battery pack with BMS and cooling.	Bitish Geological Survey - World Mineral Production	2019
				77.1 kg CO2e./kWh (SPS 2030)						GREET	2020
				72.8 kg CO2e./kWh (SPS 2040)						IEA - Electricity generation	2020
				65.6 kg CO2e./kWh (SPS 2050)						The World Bank - Electric power transmission and distribution losses	2020
				68.4 kg CO2e./kWh (SDS 2030)						Ecoinvent	2020
				58.1 kg CO2e./kWh (SDS 2040)						Statista - Projected Global Li-ion battery capacity between 2021-2025	2021
				51.7 kg CO2e./kWh (SDS 2050)						The Battery Report 2020	2020
										IEA - World Energy Outlook	2021
										Xu, Chengjian, Qiang Dai, Linda Gaines, Mingming Hu, Arnold Tukker, and Bernhard Steubing. "Future material demand for automotive lithium-based batteries." Communications Materials 1, no. 1 (2020): 99.	2020
										Everbatt	2020
6	Dynamic life cycle assessment of lithium-ion batteries for electric vehicles	2023	Llamas-Orozco	83.51 kg CO2e./kWh	2023	1 kWh of battery	N/A	N/A	The whole battery pack with BMS and cooling.	GREET	2020
										IEA - Electricity generation	2020
										The World Bank - Electric power transmission and distribution losses	2020
										Ecoinvent	2020
										Statista - Projected Global Li-ion battery capacity between 2021-2025	2021
										The Battery Report 2020	2020
										IEA - World Energy Outlook	2021
										Xu, Chengjian, Qiang Dai, Linda Gaines, Mingming Hu, Arnold Tukker, and Bernhard Steubing. "Future material demand for automotive lithium-based batteries." Communications Materials 1, no. 1 (2020): 99.	2020
										Everbatt	2020
										BGS– World Mineral Production	2019

## Sheet: NMC622
Order	Paper name	Year	Author	Key quantitative result (battery GHG)	Year for calculation	Functional unit	Cell type	Battery size	Battery pack boundary	LCI data sources	LCI data source year
1	Life cycle assessment of nickel-rich lithium-ion battery for electric vehicles A comparatative LCA between the cathode chemistries NMC 333 and NMC 622	2019	Lewren	51 kg CO2e./kWh	2019	1 kWh of battery	prismatic	83.4 kWh, 472 kg	The whole battery pack with BMS and cooling.	BatPac	2018
										Dai, Q., J. C. Kelly, and A. Elgowainy. "Cobalt life cycle analysis update for the GREET Model." Argonne National Laboratory (2018).	2018
										Dunn, Jennifer B., Christine James, Linda Gaines, Kevin Gallagher, Qiang Dai, and Jarod C. Kelly. Material and energy flows in the production of cathode and anode materials for lithium ion batteries. No. ANL/ESD-14/10 Rev. Argonne National Lab.(ANL), Argonne, IL (United States), 2015.	2015
										Ellingsen, Linda Ager‐Wick, Guillaume Majeau‐Bettez, Bhawna Singh, Akhilesh Kumar Srivastava, Lars Ole Valøen, and Anders Hammer Strømman. "Life cycle assessment of a lithium‐ion battery vehicle pack." Journal of Industrial Ecology 18, no. 1 (2014): 113-124.	2014
										GaBi 6.0	2012
										Ecoinvent 3.4	2017
										Mistry, Mark, Johannes Gediga, and Shannon Boonzaier. "Life cycle assessment of nickel products." The International Journal of Life Cycle Assessment 21 (2016): 1559-1572.	2016
										GREET	2018
2	Examining different recycling processes for lithium-ion batteries	2019	Ciez & Whitacre	42.4 kg CO2e./kWh	2019	1 kWh of battery cell	cylindrical	N/A (Specific energy=0.21 kWh/kg)	Battery cells (The whole battery pack without BMS and cooling.)	GREET 2016	2016
				36.3 kg CO2e./kWh	2019		prismatic	N/A (Specific energy=0.27 kWh/kg)		Environmental Protection Agency Emissions & Generation Resource Integrated Database 2014	2014
										Nakura, Kensuke, Kingo Ariyoshi, Hiroshi Yoshizawa, and Tsutomu Ohzuku. "Characterization of lithium insertion electrodes and its verification: prototype 18650 batteries consisting of LTO and LAMO." Journal of the Electrochemical Society 162, no. 4 (2015): A622.	2015
										BatPac	2018
										EPA Emissions & Generation Resource Integrated Database	2014
3	Life cycle assessment of lithium nickel cobalt manganese oxide (NCM) batteries for electric passenger vehicles	2020	Sun et al.	124.48 kg CO2e./kWh (excluded -30.91kg CO2e./kWh in EoL)	2020	1 kWh of battery	N/A	72.5 kWh, 630 kg	The whole battery pack with BMS and cooling.	Primary industrial data	2018
										Ecoinvent 3.0	2016
										GREET 2018	2018
4	Life Cycle Assessment of an NMC Battery for Application to Electric Light-Duty Commercial Vehicles and Comparison with a Sodium-Nickel-Chloride Battery	2021	Accardo et al.	120.87 kg CO2e./kWh	2021	1 kWh of battery	prismatic pouch	35 kWh, 222 kg	The whole battery pack with BMS and cooling.	Majeau-Bettez, G.; Hawkins, T.R.; Strømman, A.H. Life Cycle Environmental Assessment of Lithium-Ion and Nickel Metal Hydride Batteries for Plug-In Hybrid and Battery Electric Vehicles. Environ. Sci. Technol. 2011, 45, 4548–4554.	2011
										Dai, Q.; Kelly, J.C.; Gaines, L.; Wang, M. Life cycle analysis of lithium-ion batteries for automotive applications. Batteries 2019, 5, 48.	2019
										Dai, Q.; Spangenberger, J.; Ahmed, S.; Gaines, L.; Kelly, J.C.; Wang, M. EverBatt: A Closed-loop Battery Recycling Cost and Environmental Impacts Model Energy Systems Division; Argonne National Lab. (ANL): Argonne, IL, USA, 2019.	2019
										Ecoinvent 3.6	2019
5	Life-cycle analysis, by global region, of automotive lithium-ion nickel manganese cobalt batteries of varying nickel content	2022	Winjobi et al.	56.4 kg CO2e./kWh	2022	1 kWh of battery	prismatic	84 kWh	The whole battery pack with BMS and cooling.	GREET 2020/BatPac 4.0(2020)	2020
				69.4 kg CO2e./kWh	2022
				66.6 kg CO2e./kWh	2022
				64.2 kg CO2e./kWh	2022
				52.3 kg CO2e./kWh	2022
6	Future greenhouse gas emissions of automotive lithium-ion battery cell production	2022	Xu et al.	86.9 kg CO2e./kWh	2022	1 kWh of battery cell	prismatic	N/A	N/A	Ecoinvent 3.6	2019
				64.2 kg CO2e./kWh	2022					Ellingsen, Linda Ager‐Wick, Guillaume Majeau‐Bettez, Bhawna Singh, Akhilesh Kumar Srivastava, Lars Ole Valøen, and Anders Hammer Strømman. "Life cycle assessment of a lithium‐ion battery vehicle pack." Journal of Industrial Ecology 18, no. 1 (2014): 113-124.	2014
				52.7 kg CO2e./kWh	2022					Eiafans:Environmental impact assessment reports in China	2022
										Everbatt	2020
										Xu, Chengjian, Qiang Dai, Linda Gaines, Mingming Hu, Arnold Tukker, and Bernhard Steubing. "Future material demand for automotive lithium-based batteries." Communications Materials 1, no. 1 (2020): 99.	2020
										Erakca, Merve, Manuel Baumann, Werner Bauer, Lea de Biasi, Janna Hofmann, Benjamin Bold, and Marcel Weil. "Energy flow analysis of laboratory scale lithium-ion battery cell production." IScience 24, no. 5 (2021).	2021
7	Re-evaluation of the Global Warming Potential for the Production of Lithium-Ion Batteries with Nickel–Manganese–Cobalt Cathode Chemistries in China	2022		62.48 kg CO2e./kWh	2022	1 kWh of battery	N/A	N/A	The whole battery pack with BMS and cooling.	Peng, Tianduo, Xunmin Ou, Xiaoyu Yan, and Gehua Wang. "Life-cycle analysis of energy consumption and GHG emissions of aluminium production in China." Energy Procedia 158 (2019): 3937-3943.	2019
										GREET 2021	2021
										Yin, Renshu, Shuhan Hu, and Yang Yang. "Life cycle inventories of the commonly used materials for lithium-ion batteries in China." Journal of Cleaner Production 227 (2019): 960-971.	2019
										Engels, Philipp, Felipe Cerdas, Tina Dettmer, Christoph Frey, Jan Hentschel, Christoph Herrmann, Tina Mirfabrikikar, and Maximilian Schueler. "Life cycle assessment of natural graphite production for lithium-ion battery anodes based on industrial primary data." Journal of Cleaner Production 336 (2022): 130474.	2022
8	Estimating the environmental impacts of global lithium-ion battery supply chain: A temporal, geographical, and technological perspective	2023	Llamas-Orozco	79.7 kg CO2e./kWh (year 2020)	2023	1 kWh of battery	N/A	N/A	The whole battery pack with BMS and cooling.	Bitish Geological Survey - World Mineral Production	2019
				73.6 kg CO2e./kWh (SPS 2030)						GREET	2020
				69.3 kg CO2e./kWh (SPS 2040)						IEA - Electricity generation	2020
				63.0 kg CO2e./kWh (SPS 2050)						The World Bank - Electric power transmission and distribution losses	2020
				65.6 kg CO2e./kWh (SDS 2030)						Ecoinvent	2020
				55.7 kg CO2e./kWh (SDS 2040)						Statista - Projected Global Li-ion battery capacity between 2021-2025	2021
				49.4 kg CO2e./kWh (SDS 2050)						The Battery Report 2020	2020
										IEA - World Energy Outlook	2021
										Xu, Chengjian, Qiang Dai, Linda Gaines, Mingming Hu, Arnold Tukker, and Bernhard Steubing. "Future material demand for automotive lithium-based batteries." Communications Materials 1, no. 1 (2020): 99.	2020
										Everbatt	2020
9	Dynamic life cycle assessment of lithium-ion batteries for electric vehicles	2023	Llamas-Orozco	79.66 kg CO2e./kWh	2023	1 kWh of battery	N/A	N/A	The whole battery pack with BMS and cooling.	GREET	2020
										IEA - Electricity generation	2020
										The World Bank - Electric power transmission and distribution losses	2020
										Ecoinvent	2020
										Statista - Projected Global Li-ion battery capacity between 2021-2025	2021
										The Battery Report 2020	2020
										IEA - World Energy Outlook	2021
										Xu, Chengjian, Qiang Dai, Linda Gaines, Mingming Hu, Arnold Tukker, and Bernhard Steubing. "Future material demand for automotive lithium-based batteries." Communications Materials 1, no. 1 (2020): 99.	2020
										Everbatt	2020
										BGS– World Mineral Production	2019
10	LCA and LCC of a Li-ion Battery Pack for Automotive Application	2023	Di Vittorio et al.	81.4 kg CO2e./kWh	2023	1 kWh of battery	prismatic	95 kWh	The whole battery pack with BMS and cooling.	Everbatt	2020
										Heimes, Heiner Hans, Achim Kampker, Christoph Lienemann, Marc Locke, Christian Offermanns, Sarah Michaelis, and Ehsan Rahimzei. Lithium-ion battery cell production process. PEM der RWTH Aachen University, 2018.	2018
										Ahmed, Shabbir, Paul A. Nelson, Kevin G. Gallagher, and Dennis W. Dees. "Energy impact of cathode drying and solvent recovery during lithium-ion battery manufacturing." Journal of Power Sources 322 (2016): 169-178.	2016
										Degen, Florian, and Marius Schütte. "Life cycle assessment of the energy consumption and GHG emissions of state-of-the-art automotive battery cell production." Journal of Cleaner Production 330 (2022): 129798.	2022
11	Analyzing the global warming potential of the production and utilization of lithium-ion batteries with nickel-manganese-cobalt cathode chemistries in European Gigafactories	2024	Tabrizi et al.	54.3 kg CO2e./kWh	2024	1 kWh of battery	N/A	23.5 kWh, 140.73 kg	The whole battery pack with BMS and cooling.	GREET 2021	2021
				47.6 kg CO2e./kWh	2024					BatPac	N/A
				55.3 kg CO2e./kWh	2024					Dai, Qiang, Jarod C. Kelly, Linda Gaines, and Michael Wang. "Life cycle analysis of lithium-ion batteries for automotive applications." Batteries 5, no. 2 (2019): 48.	2019
				80.0 kg CO2e./kWh	2024					Zu, Chenxi, Yu Ren, Fuliang Guo, Huigen Yu, and Hong Li. "A Reflection on Lithium‐Ion Batteries from a Lithium‐Resource Perspective." Advanced Energy and Sustainability Research 2, no. 10 (2021): 2100062.	2021

## Sheet: NMC811
Order	Paper name	Year	Author	Key quantitative result (battery GHG)	Year for calculation	Functional unit	Cell type	Battery size	Battery pack boundary	LCI data sources	LCI data source year
1	Life Cycle Assessment of an NMC Battery for Application to Electric Light-Duty Commercial Vehicles and Comparison with a Sodium-Nickel-Chloride Battery	2021	Accardo et al.	128.48 kg CO2e./kWh	2021	1 kWh of battery	prismatic pouch	35 kWh, 223 kg	The whole battery pack with BMS and cooling.	Majeau-Bettez, G.; Hawkins, T.R.; Strømman, A.H. Life Cycle Environmental Assessment of Lithium-Ion and Nickel Metal Hydride Batteries for Plug-In Hybrid and Battery Electric Vehicles. Environ. Sci. Technol. 2011, 45, 4548–4554.	2011
										Dai, Q.; Kelly, J.C.; Gaines, L.; Wang, M. Life cycle analysis of lithium-ion batteries for automotive applications. Batteries 2019, 5, 48.	2019
										Dai, Q.; Spangenberger, J.; Ahmed, S.; Gaines, L.; Kelly, J.C.; Wang, M. EverBatt: A Closed-loop Battery Recycling Cost and Environmental Impacts Model Energy Systems Division; Argonne National Lab. (ANL): Argonne, IL, USA, 2019.	2019
										Ecoinvent 3.6	2019
2	Life-cycle analysis, by global region, of automotive lithium-ion nickel manganese cobalt batteries of varying nickel content	2022	Winjobi et al.	55.1 kg CO2e./kWh	2022	1 kWh of battery	prismatic	84 kWh	The whole battery pack with BMS and cooling.	GREET 2020/BatPac 4.0(2020)	2020
				68.0 kg CO2e./kWh	2022
				65.2 kg CO2e./kWh	2022
				62.8 kg CO2e./kWh	2022
				51.0 kg CO2e./kWh	2022
3	Comparative Life Cycle Assessment Study Of Solid State And Lithium-Ion Batteries For Electric Vehicle Application In Europe	2022	Pell et al.	76.7 kg CO2e./kWh	2022	1 kWh of battery	pouch	N/A (Specific energy=0.25 kWh/kg)	The whole battery pack with BMS and cooling.	Minviro's internal database	N/A
										Ecoinvent 3.8	2022
										GREET	2021
4	Re-evaluation of the Global Warming Potential for the Production of Lithium-Ion Batteries with Nickel–Manganese–Cobalt Cathode Chemistries in China	2022		61.78 kg CO2e./kWh	2022	1 kWh of battery	N/A	N/A	The whole battery pack with BMS and cooling.	Peng, Tianduo, Xunmin Ou, Xiaoyu Yan, and Gehua Wang. "Life-cycle analysis of energy consumption and GHG emissions of aluminium production in China." Energy Procedia 158 (2019): 3937-3943.	2019
										GREET 2021	2021
										Yin, Renshu, Shuhan Hu, and Yang Yang. "Life cycle inventories of the commonly used materials for lithium-ion batteries in China." Journal of Cleaner Production 227 (2019): 960-971.	2019
										Engels, Philipp, Felipe Cerdas, Tina Dettmer, Christoph Frey, Jan Hentschel, Christoph Herrmann, Tina Mirfabrikikar, and Maximilian Schueler. "Life cycle assessment of natural graphite production for lithium-ion battery anodes based on industrial primary data." Journal of Cleaner Production 336 (2022): 130474.	2022
5	Estimating the environmental impacts of global lithium-ion battery supply chain: A temporal, geographical, and technological perspective	2023	Llamas-Orozco	79.6 kg CO2e./kWh (year 2020)	2023	1 kWh of battery	N/A	N/A	The whole battery pack with BMS and cooling.	Bitish Geological Survey - World Mineral Production	2019
				73.6 kg CO2e./kWh (SPS 2030)						GREET	2020
				69.6 kg CO2e./kWh (SPS 2040)						IEA - Electricity generation	2020
				62.7 kg CO2e./kWh (SPS 2050)						The World Bank - Electric power transmission and distribution losses	2020
				65.0 kg CO2e./kWh (SDS 2030)						Ecoinvent	2020
				55.2 kg CO2e./kWh (SDS 2040)						Statista - Projected Global Li-ion battery capacity between 2021-2025	2021
				48.8 kg CO2e./kWh (SDS 2050)						The Battery Report 2020	2020
										IEA - World Energy Outlook	2021
										Xu, Chengjian, Qiang Dai, Linda Gaines, Mingming Hu, Arnold Tukker, and Bernhard Steubing. "Future material demand for automotive lithium-based batteries." Communications Materials 1, no. 1 (2020): 99.	2020
										Everbatt	2020
6	Dynamic life cycle assessment of lithium-ion batteries for electric vehicles	2023	Llamas-Orozco	79.60 kg CO2e./kWh	2023	1 kWh of battery	N/A	N/A	The whole battery pack with BMS and cooling.	GREET	2020
										IEA - Electricity generation	2020
										The World Bank - Electric power transmission and distribution losses	2020
										Ecoinvent	2020
										Statista - Projected Global Li-ion battery capacity between 2021-2025	2021
										The Battery Report 2020	2020
										IEA - World Energy Outlook	2021
										Xu, Chengjian, Qiang Dai, Linda Gaines, Mingming Hu, Arnold Tukker, and Bernhard Steubing. "Future material demand for automotive lithium-based batteries." Communications Materials 1, no. 1 (2020): 99.	2020
										Everbatt	2020
										BGS– World Mineral Production	2019
7	Environmental impact assessment of lithium ion battery employing cradle to grave	2023	Bawankar et al.	N/A		1 kWh of battery	pouch, cylindrical	124 kWh	The whole battery pack with BMS and cooling.	Ecoinvent	N/A
										Dunn, Jennifer B., Linda Gaines, John Sullivan, and Michael Q. Wang. "Impact of recycling on cradle-to-gate energy consumption and greenhouse gas emissions of automotive lithium-ion batteries." Environmental science & technology 46, no. 22 (2012): 12704-12710.	2012
										Pagliaro, Mario, and Francesco Meneguzzo. "Lithium battery reusing and recycling: A circular economy insight." Heliyon 5, no. 6 (2019).	2019
										Li, Bingbing, Xianfeng Gao, Jianyang Li, and Chris Yuan. "Life cycle environmental impact of high-capacity lithium ion battery with silicon nanowires anode for electric vehicles." Environmental science & technology 48, no. 5 (2014): 3047-3055.	2014
										Tagliaferri, Carla, Sara Evangelisti, Federica Acconcia, Teresa Domenech, Paul Ekins, Diego Barletta, and Paola Lettieri. "Life cycle assessment of future electric and hybrid vehicles: A cradle-to-grave systems engineering approach." Chemical Engineering Research and Design 112 (2016): 298-309.	2016
										Zackrisson, Mats. "Life cycle assessment of lithium ion battery recycling-The ReLion process." I: RISE (2019): 2020-10.	2019
8	Comparison of lithium-ion battery supply chains – a life cycle sustainability assessment	2023	Popien et al.	102.58 kg CO2e./kWh	2023	1 kWh of battery	N/A	100 kWh	The whole battery pack without BMS and cooling.	GREET	N/A
										BatPac 5.0	N/A
										Popien, Jan-Linus, Christian Thies, Alexander Barke, and Thomas S. Spengler. "Comparative sustainability assessment of lithium-ion, lithium-sulfur, and all-solid-state traction batteries." The international journal of life cycle assessment 28, no. 4 (2023): 462-477.	2023
										Engels, Philipp, Felipe Cerdas, Tina Dettmer, Christoph Frey, Jan Hentschel, Christoph Herrmann, Tina Mirfabrikikar, and Maximilian Schueler. "Life cycle assessment of natural graphite production for lithium-ion battery anodes based on industrial primary data." Journal of Cleaner Production 336 (2022): 130474.	2022
										Chordia, Mudit, Anders Nordelöf, and Linda Ager-Wick Ellingsen. "Environmental life cycle implications of upscaling lithium-ion battery production." The International Journal of Life Cycle Assessment 26 (2021): 2024-2039.	2021
										Yuan, Chris, Yelin Deng, Tonghui Li, and Fan Yang. "Manufacturing energy analysis of lithium ion battery pack for electric vehicles." CIRP Annals 66, no. 1 (2017): 53-56.	2017
										Deng, Yelin, Jianyang Li, Tonghui Li, Xianfeng Gao, and Chris Yuan. "Life cycle assessment of lithium sulfur battery for electric vehicles." Journal of Power Sources 343 (2017): 284-295.	2017
										Ellingsen, Linda Ager‐Wick, Guillaume Majeau‐Bettez, Bhawna Singh, Akhilesh Kumar Srivastava, Lars Ole Valøen, and Anders Hammer Strømman. "Life cycle assessment of a lithium‐ion battery vehicle pack." Journal of Industrial Ecology 18, no. 1 (2014): 113-124.	2014
9	Analyzing the global warming potential of the production and utilization of lithium-ion batteries with nickel-manganese-cobalt cathode chemistries in European Gigafactories	2024	Tabrizi et al.	54.1 kg CO2e./kWh	2024	1 kWh of battery	N/A	23.5 kWh, 129.47 kg	The whole battery pack with BMS and cooling.	GREET 2021	2021
				47.3 kg CO2e./kWh	2024					BatPac	N/A
				55.0 kg CO2e./kWh	2024					Dai, Qiang, Jarod C. Kelly, Linda Gaines, and Michael Wang. "Life cycle analysis of lithium-ion batteries for automotive applications." Batteries 5, no. 2 (2019): 48.	2019
				79.7 kg CO2e./kWh	2024					Zu, Chenxi, Yu Ren, Fuliang Guo, Huigen Yu, and Hong Li. "A Reflection on Lithium‐Ion Batteries from a Lithium‐Resource Perspective." Advanced Energy and Sustainability Research 2, no. 10 (2021): 2100062.	2021
10	Comparative Life Cycle Assessment of Battery and Fuel Cell Electric Cars, Trucks, and Buses	2024	Syre et al.	134 kg CO2e./kWh	2024	1 kg of battery/1 kWh of battery	prismatic	N/A (Specific energy=0.149 kWh/kg)	The whole battery pack with BMS and cooling.	Ecoinvent 3.9.1	2022
										Everbatt	2024
										Dai, Q., J. Dunn, J. C. Kelly, and A. Elgowainy. "Update of life cycle analysis of lithium-ion batteries in the GREET model." Argonne National Laboratory 20171 (2017).	2017
										Dai, Qiang, Jarod C. Kelly, Linda Gaines, and Michael Wang. "Life cycle analysis of lithium-ion batteries for automotive applications." Batteries 5, no. 2 (2019): 48.	2019

## Sheet: LFP (Solid State)
Order	Paper name	Year	Author	Key quantitative result (battery GHG)	Year for calculation	Functional unit	Cell type	Battery size	Battery pack boundary	LCI data sources	LCI data source year
1	The significance of Li-ion batteries in electric vehicle life-cycle energy and emissions and recycling's role in its reduction	2015	Dunn et al.	LFP-C(solid-state): N/A		1 kg of battery	prismatic	28 kWh, 230 kg	The whole battery pack with BMS and cooling.	Dunn, Jennifer B., Linda Gaines, John Sullivan, and Michael Q. Wang. "Impact of recycling on cradle-to-gate energy consumption and greenhouse gas emissions of automotive lithium-ion batteries." Environmental science & technology 46, no. 22 (2012): 12704-12710.	2012
										BatPac 2011	2011
2	Effects of battery chemistry and performance on the life cycle greenhouse gas intensity of electric mobility	2016	Ambrose and Kendall	252 kg CO2e./kWh	2016	1 electric vehicle kilometer of travel (e-VKT)	prismatic pouch	N/A	The whole battery pack with BMS and cooling.	BatPac-Nelson, Paul A., Shabbir Ahmed, Kevin G. Gallagher, and Dennis W. Dees. Modeling the performance and cost of lithium-ion batteries for electric-drive vehicles. No. ANL/CSE-19/2. Argonne National Lab.(ANL), Argonne, IL (United States), 2019.	2019
										GREET-Dunn, Jennifer B., Linda Gaines, Matthew Barnes, John L. Sullivan, and Michael Wang. Material and energy flows in the materials production, assembly, and end-of-life stages of the automotive lithium-ion battery life cycle. No. ANL/ESD/12-3 Rev. Argonne National Lab.(ANL), Argonne, IL (United States), 2014.	2014
										GREET-Burnham, Andrew, M. Q. Wang, and Y. Wu. Development and applications of GREET 2.7--The Transportation Vehicle-CycleModel. No. ANL/ESD/06-5. Argonne National Lab.(ANL), Argonne, IL (United States), 2006.	2006
3	Environmental and Economic Performance of an Li-Ion Battery Pack: A Multiregional Input-Output Approach	2016	Sanfélix et al.	306.98 kg CO2e./kWh	2016	1 km of driving	N/A	20 kWh, 318 kg	The whole battery pack with BMS and cooling.	World Input–Output Database (WIOD)	2015
4	Life cycle assessment of electric vehicle power battery	2016	Lu et al.	75.04 kg CO2e./kWh	2016	1 kWh of battery	N/A	20 kWh, 167 kg	The whole battery pack with BMS, but it doesn’t have a cooling system.	Primary industrial data	N/A
										Dunn, Jennifer B., Linda Gaines, John Sullivan, and Michael Q. Wang. "Impact of recycling on cradle-to-gate energy consumption and greenhouse gas emissions of automotive lithium-ion batteries." Environmental science & technology 46, no. 22 (2012): 12704-12710.	2012
5	Life cycle assessment of long life lithium electrode for electric vehicle batteries: cells for Leaf, Tesla and Volvo bus	2017	Zackrisson	100.0 kg CO2e./kWh	2017	1 km driving	pouch	76 kWh, 599 kg	The whole battery pack with BMS and cooling.	Own lab data	2016
										Ecoinvent 3.1	2014
										Ellingsen, Linda Ager‐Wick, Guillaume Majeau‐Bettez, Bhawna Singh, Akhilesh Kumar Srivastava, Lars Ole Valøen, and Anders Hammer Strømman. "Life cycle assessment of a lithium‐ion battery vehicle pack." Journal of Industrial Ecology 18, no. 1 (2014): 113-124.	2014
6	Cradle-to-gate greenhouse gas emissions of battery electric and internal combustion engine vehicles in China	2017	Qiao et al	127.75 kg CO2e./kWh	2017			228 kg		Lu, Qiang, Peng Fei Wu, Wan Xia Shen, Xue Chao Wang, Bo Zhang, and Cheng Wang. "Life cycle assessment of electric vehicle power battery." In Materials Science Forum, vol. 847, pp. 403-410. Trans Tech Publications Ltd, 2016.	2016
										GREET 2016	2016
										GREET 2.7-Burnham, Andrew. "Updated vehicle specifications in the GREET vehicle-cycle model." Argonne National Laboratory (2012).	2012
										Primary industrial data
										BatPac-Nelson, Paul A., Shabbir Ahmed, Kevin G. Gallagher, and Dennis W. Dees. Modeling the performance and cost of lithium-ion batteries for electric-drive vehicles - Second Edition. Argonne National Lab.(ANL), Argonne, IL (United States), 2012.	2012
7	Comparative study on life cycle CO2 emissions from the production of electric and conventional vehicles in China	2017	Qiao et al	N/A				230 kg		GREET 2015	2015
8	GHG Emissions from the production of lithium-ion batteries for electric vehicles in China	2017	Hao et al.	109.3 kg CO2e./kWh	2017	1 kWh of battery	N/A	28 kWh, 230 kg	The whole battery pack with BMS and cooling.	Primary industrial data	2015
										GREET 2015	2015
										BatPac 2015	2015
										Majeau-Bettez, Guillaume, Troy R. Hawkins, and Anders Hammer Strømman. "Life cycle environmental assessment of lithium-ion and nickel metal hydride batteries for plug-in hybrid and battery electric vehicles." Environmental science & technology 45, no. 10 (2011): 4548-4554.	2011
										Lu, Languang, Xuebing Han, Jianqiu Li, Jianfeng Hua, and Minggao Ouyang. "A review on the key issues for lithium-ion battery management in electric vehicles." Journal of power sources 226 (2013): 272-288.	2013
9	Environmental impacts of lithium metal polymer and lithium-ion stationary batteries	2017	Vandepaer, Cloutier & Amor	111.12 kg CO2e./kWh (130.73 kg CO2e./kWh considering use&maintenance (11%) and EoL(4%))	2017	1 MWh of electricity delivery	N/A	75 kWh	The whole battery pack with BMS, but it doesn’t have a cooling system.	Primary industrial data	N/A
										Majeau-Bettez, Guillaume, Troy R. Hawkins, and Anders Hammer Strømman. "Life cycle environmental assessment of lithium-ion and nickel metal hydride batteries for plug-in hybrid and battery electric vehicles." Environmental science & technology 45, no. 10 (2011): 4548-4554.	2011
										Amarakoon, S., J. Smith, and B. Segal. "Lithium-ion batteries and nanotechnology for electric vehicles: a life cycle assessment." US Environnemental Protection Agency: Washington DC, USA (2012).	2012
										Gaines, Linda, John Sullivan, Andrew Burnham, and Ilias Belharouak. "Life-cycle analysis of production and recycling of lithium ion batteries." Transportation research record 2252, no. 1 (2011): 57-65.	2011
10	Life cycle environmental impacts and carbon emissions: a case study of electric and gasoline vehicles in China	2018	Yu et al.	113.50 kg CO2e./kWh	2018	the vehicle travelling distance of a single power system during its life cycle (250,000 km)	N/A	39.38 kWh, 218.80 kg	Materials used in battery module and pack assembly, e.g. connectors, fuses, sensors, printed wiring boards, coolants, were not considered.	Primary industrial data	2015
										GaBi 6.0	2012
										Zackrisson, Mats, Lars Avellán, and Jessica Orlenius. "Life cycle assessment of lithium-ion batteries for plug-in hybrid electric vehicles–Critical issues." Journal of cleaner production 18, no. 15 (2010): 1519-1529.	2010
11	Environmental and economic comparison of diesel and battery electric delivery vans to inform city logistics fleet replacement strategies	2018	Giordano et al.	205.13 kg CO2e./kWh	2018	1 km driven by an average loaded delivery van in an urban setting	N/A	23.4 kWh, 221.3 kg	The whole battery pack with BMS and cooling.	BatPac 2.2	N/A
				102.56 kg CO2e./kWh	2018			46.8 kWh, 442.5 kg		GREET 2014	2014
				68.38 kg CO2e./kWh	2018			70.2 kWh, 663.8 kg		Ecoinvent 3.0	2016
12	Life cycle inventories of the commonly used materials for lithium-ion batteries in China	2019	Yin, Hu & Yang	83.5 kg CO2e./kWh	2019	1 kWh of battery	N/A	N/A	Materials used in battery module and pack assembly, e.g. connectors, fuses, sensors, printed wiring boards, coolants, were not considered.	Primary industrial data	2015
										Chinese Life Cycle Database (CLCD, version 0.8)-Ike, S. I. "Chinese Life Cycle Database (CLCD)." (2012).	2012
										Ecoinvent 3.0	2016
										GaBi 6.0	2012
13	Comparative life cycle assessment of lithium-ion batteries for electric vehicles addressing capacity fade	2019	Marques et al.	313.5 kg CO2e./kWh	2019	A service life of 200,000km for the BEV	N/A	24 kWh, 368 kg	Components like BMS and coolant are not considered.	Notter, Dominic A., Marcel Gauch, Rolf Widmer, Patrick Wager, Anna Stamp, Rainer Zah, and Hans-Jorg Althaus. "Contribution of Li-ion batteries to the environmental impact of electric vehicles." (2010): 6550-6556.	2010
										Zackrisson, Mats, Lars Avellán, and Jessica Orlenius. "Life cycle assessment of lithium-ion batteries for plug-in hybrid electric vehicles–Critical issues." Journal of cleaner production 18, no. 15 (2010): 1519-1529.	2010
14	Examining different recycling processes for lithium-ion batteries	2019	Ciez & Whitacre	73 kg CO2e./kWh	2019	1 kWh of battery cell	cylindrical	N/A (Specific energy=0.1 kWh/kg)	The whole battery pack without BMS and cooling.	GREET 2016	2016
				33.9 kg CO2e./kWh	2019		prismatic	N/A (Specific energy=0.19 kWh/kg)		Environmental Protection Agency Emissions & Generation Resource Integrated Database 2014	2014
										Nakura, Kensuke, Kingo Ariyoshi, Hiroshi Yoshizawa, and Tsutomu Ohzuku. "Characterization of lithium insertion electrodes and its verification: prototype 18650 batteries consisting of LTO and LAMO." Journal of the Electrochemical Society 162, no. 4 (2015): A622.	2015
										BatPac	2018
										EPA Emissions & Generation Resource Integrated Database	2014
15	Toward a cell-chemistry specific life cycle assessment of lithium-ion battery recycling processes	2020	Mohr et al.	101.1 kg CO2e./kWh	2020	1 kWh of battery	pouch	N/A (Specific energy=0.108 kWh/kg)	The whole battery pack without BMS and cooling.	Primary industrial data	N/A
										Ecoinvent 3.4	2017
										Peters, Jens F., and Marcel Weil. "Providing a common base for life cycle assessments of Li-Ion batteries." Journal of Cleaner Production 171 (2018): 704-713.	2018
										Dai, Qiang, Jarod C. Kelly, Jennifer Dunn, and Pahola Thatiana Benavides. "Update of Bill-of-materials and Cathode Materials Production for Lithium-ion Batteries in the GREET Model." Argonne National Laboratory (2018).	2018
16	Life-cycle assessment of the environmental impact of the batteries used in pure electric passenger cars	2021	Shu et al.	46.2 kg CO2e./kWh	2021	1 battery	N/A	28.2 kWh, 232.5 kg	The whole battery pack with BMS and cooling.	Primary industrial data-Chinese leading LIB supplier	N/A
										European Reference Life Cycle Database (ELCD)	N/A
										Ellingsen, Linda Ager‐Wick, Guillaume Majeau‐Bettez, Bhawna Singh, Akhilesh Kumar Srivastava, Lars Ole Valøen, and Anders Hammer Strømman. "Life cycle assessment of a lithium‐ion battery vehicle pack." Journal of Industrial Ecology 18, no. 1 (2014): 113-124.	2014
17	Lithium-ion batteries for automotive applications: Life cycle analysis	2021	Dai et al.	54.9 kg CO2e./kWh	2021	1 kWh of battery	prismatic	26.9 kWh	The whole battery pack with BMS and cooling.	GREET 2018 (large-scale primary industrial data)	2018
18	The environmental footprint of electric vehicle battery packs during the production and use phases with different functional units	2021	Wu et al.	147.38 kg CO2e./kWh	2021	1 kg of battery/1 kWh of battery	N/A	N/A	The whole battery pack with BMS and cooling.	Almeida, Arminda, Nuno Sousa, and João Coutinho-Rodrigues. "Quest for sustainability: Life-cycle emissions assessment of electric vehicles considering newer Li-ion batteries." Sustainability 11, no. 8 (2019): 2366.	2019
										Yu, Ang, Yiqun Wei, Wenwen Chen, Najun Peng, and Lihong Peng. "Life cycle environmental impacts and carbon emissions: A case study of electric and gasoline vehicles in China." Transportation Research Part D: Transport and Environment 65 (2018): 409-420.	2018
										Ellingsen, Linda Ager‐Wick, Guillaume Majeau‐Bettez, Bhawna Singh, Akhilesh Kumar Srivastava, Lars Ole Valøen, and Anders Hammer Strømman. "Life cycle assessment of a lithium‐ion battery vehicle pack." Journal of Industrial Ecology 18, no. 1 (2014): 113-124.	2014
										Majeau-Bettez, Guillaume, Troy R. Hawkins, and Anders Hammer Strømman. "Life cycle environmental assessment of lithium-ion and nickel metal hydride batteries for plug-in hybrid and battery electric vehicles." Environmental science & technology 45, no. 10 (2011): 4548-4554.	2011
19	Comparative life cycle assessment of LFP and NCM batteries including the secondary use and different recycling technologies	2022	Quan et al.	76.5 kg CO2e./kWh	2022	1 kWh of battery	N/A	23.1 kWh, 203.1 kg	The whole battery pack with BMS and cooling.	Ecoinvent	N/A
										GREET	N/A
										GaBi 6.0	2012
										Primary industrial data	2016
										Ellingsen, Linda Ager‐Wick, Guillaume Majeau‐Bettez, Bhawna Singh, Akhilesh Kumar Srivastava, Lars Ole Valøen, and Anders Hammer Strømman. "Life cycle assessment of a lithium‐ion battery vehicle pack." Journal of Industrial Ecology 18, no. 1 (2014): 113-124.	2014
20	Environmental impacts of hydrometallurgical recycling and reusing for manufacturing of lithium-ion traction batteries in China	2022	Jiang et al.	118.3 kg CO2e./kWh	2022	1 kg of battery cell	prismatic	N/A (Specific energy=0.12 kWh/kg)	Battery cells (The whole battery pack without BMS and cooling.)	Ecoinvent 3.7	2020
										Primary industrial data-manufacturing companies in Anhui for NMC and Shandong for LFP	N/A
21	Life Cycle Prediction Assessment of Battery Electrical Vehicles with Special Focus on Different Lithium-Ion Power Batteries in China	2022	Yang et al.	93.7 kg CO2e./kWh (year 2020)	2022	1 kWh of battery	N/A	57 kWh, 335 kg	The whole battery pack with BMS and cooling.	Notter, Dominic A., Marcel Gauch, Rolf Widmer, Patrick Wager, Anna Stamp, Rainer Zah, and Hans-Jorg Althaus. "Contribution of Li-ion batteries to the environmental impact of electric vehicles." (2010): 6550-6556.	2010
				68.7 kg CO2e./kWh (year 2025)	2022					Ellingsen, Linda Ager‐Wick, Guillaume Majeau‐Bettez, Bhawna Singh, Akhilesh Kumar Srivastava, Lars Ole Valøen, and Anders Hammer Strømman. "Life cycle assessment of a lithium‐ion battery vehicle pack." Journal of Industrial Ecology 18, no. 1 (2014): 113-124.	2014
				52.6 kg CO2e./kWh (year 2030)	2022					Tagliaferri, Carla, Sara Evangelisti, Federica Acconcia, Teresa Domenech, Paul Ekins, Diego Barletta, and Paola Lettieri. "Life cycle assessment of future electric and hybrid vehicles: A cradle-to-grave systems engineering approach." Chemical Engineering Research and Design 112 (2016): 298-309.	2016
22	Future greenhouse gas emissions of automotive lithium-ion battery cell production	2022	Xu et al.	68.9 kg CO2e./kWh	2022	1 kWh of battery cell	prismatic	N/A	N/A	Ecoinvent 3.6	2019
				49.5 kg CO2e./kWh	2022					Ellingsen, Linda Ager‐Wick, Guillaume Majeau‐Bettez, Bhawna Singh, Akhilesh Kumar Srivastava, Lars Ole Valøen, and Anders Hammer Strømman. "Life cycle assessment of a lithium‐ion battery vehicle pack." Journal of Industrial Ecology 18, no. 1 (2014): 113-124.	2014
				39.4 kg CO2e./kWh	2022					Eiafans:Environmental impact assessment reports in China	2022
										Everbatt	2020
										Xu, Chengjian, Qiang Dai, Linda Gaines, Mingming Hu, Arnold Tukker, and Bernhard Steubing. "Future material demand for automotive lithium-based batteries." Communications Materials 1, no. 1 (2020): 99.	2020
										Erakca, Merve, Manuel Baumann, Werner Bauer, Lea de Biasi, Janna Hofmann, Benjamin Bold, and Marcel Weil. "Energy flow analysis of laboratory scale lithium-ion battery cell production." IScience 24, no. 5 (2021).	2021
23	Comparative Life Cycle Assessment Study Of Solid State And Lithium-Ion Batteries For Electric Vehicle Application In Europe	2022	Pell et al.	77.9 kg CO2e./kWh	2022	1 kWh of battery	pouch	N/A (Specific energy=0.174 kWh/kg)	The whole battery pack with BMS and cooling.	Minviro's internal database	N/A
										Ecoinvent 3.8	2022
										GREET	2021
24	Estimating the environmental impacts of global lithium-ion battery supply chain: A temporal, geographical, and technological perspective	2023	Llamas-Orozco	56.4 kg CO2e./kWh (year 2020)	2023	1 kWh of battery	N/A	N/A	The whole battery pack with BMS and cooling.	Bitish Geological Survey - World Mineral Production	2019
				52.0 kg CO2e./kWh (SPS 2030)						GREET	2020
				48.8 kg CO2e./kWh (SPS 2040)						IEA - Electricity generation	2020
				43.3 kg CO2e./kWh (SPS 2050)						The World Bank - Electric power transmission and distribution losses	2020
				45.6 kg CO2e./kWh (SDS 2030)						Ecoinvent	2020
				38.4 kg CO2e./kWh (SDS 2040)						Statista - Projected Global Li-ion battery capacity between 2021-2025	2021
				33.8 kg CO2e./kWh (SDS 2050)						The Battery Report 2020	2020
										IEA - World Energy Outlook	2021
										Xu, Chengjian, Qiang Dai, Linda Gaines, Mingming Hu, Arnold Tukker, and Bernhard Steubing. "Future material demand for automotive lithium-based batteries." Communications Materials 1, no. 1 (2020): 99.	2020
										Everbatt	2020
25	Dynamic life cycle assessment of lithium-ion batteries for electric vehicles	2023	Llamas-Orozco	56.44 kg CO2e./kWh		1 kWh of battery	N/A	N/A	The whole battery pack with BMS and cooling.	GREET	2020
										IEA - Electricity generation	2020
										The World Bank - Electric power transmission and distribution losses	2020
										Ecoinvent	2020
										Statista - Projected Global Li-ion battery capacity between 2021-2025	2021
										The Battery Report 2020	2020
										IEA - World Energy Outlook	2021
										Xu, Chengjian, Qiang Dai, Linda Gaines, Mingming Hu, Arnold Tukker, and Bernhard Steubing. "Future material demand for automotive lithium-based batteries." Communications Materials 1, no. 1 (2020): 99.	2020
										Everbatt	2020
										BGS– World Mineral Production	2019
26	Comparison of lithium-ion battery supply chains – a life cycle sustainability assessment	2023	Popien et al.	99.15 kg CO2e./kWh	2023	1 kWh of battery	N/A	100 kWh	The whole battery pack without BMS and cooling.	GREET	N/A
										BatPac 5.0	N/A
										Popien, Jan-Linus, Christian Thies, Alexander Barke, and Thomas S. Spengler. "Comparative sustainability assessment of lithium-ion, lithium-sulfur, and all-solid-state traction batteries." The international journal of life cycle assessment 28, no. 4 (2023): 462-477.	2023
										Engels, Philipp, Felipe Cerdas, Tina Dettmer, Christoph Frey, Jan Hentschel, Christoph Herrmann, Tina Mirfabrikikar, and Maximilian Schueler. "Life cycle assessment of natural graphite production for lithium-ion battery anodes based on industrial primary data." Journal of Cleaner Production 336 (2022): 130474.	2022
										Chordia, Mudit, Anders Nordelöf, and Linda Ager-Wick Ellingsen. "Environmental life cycle implications of upscaling lithium-ion battery production." The International Journal of Life Cycle Assessment 26 (2021): 2024-2039.	2021
										Yuan, Chris, Yelin Deng, Tonghui Li, and Fan Yang. "Manufacturing energy analysis of lithium ion battery pack for electric vehicles." CIRP Annals 66, no. 1 (2017): 53-56.	2017
										Deng, Yelin, Jianyang Li, Tonghui Li, Xianfeng Gao, and Chris Yuan. "Life cycle assessment of lithium sulfur battery for electric vehicles." Journal of Power Sources 343 (2017): 284-295.	2017
										Ellingsen, Linda Ager‐Wick, Guillaume Majeau‐Bettez, Bhawna Singh, Akhilesh Kumar Srivastava, Lars Ole Valøen, and Anders Hammer Strømman. "Life cycle assessment of a lithium‐ion battery vehicle pack." Journal of Industrial Ecology 18, no. 1 (2014): 113-124.	2014
27	Environmental Assessment of Lithium-Ion Battery Lifecycle and of Their Use in Commercial Vehicles	2024	Nastasi et al.	117.5 kg CO2e./kWh	2024	1 kg of battery	Average	23.5 kWh, 203.1 kg (147.59 kg of cells)	The whole battery pack with BMS and cooling.	Primary industrial data	N/A
				178.2 kg CO2e./kWh	2024					Secondary literature	N/A
				106.1 kg CO2e./kWh	2024					Ecoinvent	N/A
										GREET	N/A
28	Comparative Life Cycle Assessment of Battery and Fuel Cell Electric Cars, Trucks, and Buses	2024	Syre et al.	123.5 kg CO2e./kWh	2024	1 kg of battery/1 kWh of battery	prismatic	N/A (Specific energy=0.116 kWh/kg)	The whole battery pack with BMS and cooling.	Ecoinvent 3.9.1	2022
										Everbatt	2024
										Dai, Q., J. Dunn, J. C. Kelly, and A. Elgowainy. "Update of life cycle analysis of lithium-ion batteries in the GREET model." Argonne National Laboratory 20171 (2017).	2017
										Dai, Qiang, Jarod C. Kelly, Linda Gaines, and Michael Wang. "Life cycle analysis of lithium-ion batteries for automotive applications." Batteries 5, no. 2 (2019): 48.	2019
